# Supplementary material for: Can time-dependent density functional theory predict intersystem crossing in organic chromophores? A case study on benzo(bis)-X-diazole based donor–acceptor–donor type molecules
Source: Royal Society of Chemistry journal article supplement (doi:10.1039/c7cp03121a), 2017-01-01
Supplement: c7cp03121a1.pdf [file c7cp03121a1.pdf]

Supporting Information

## Can Time-Dependent Density Functional Theory Predict Intersystem Crossing in Organic Chromophores? A Case Study on Benzo(bis)-X-diazole Based Donor-Acceptor-Donor Type Molecules

Teck Lip Dexter Tam,<sup>†a</sup> Ting Ting Lin,<sup>a</sup> Ming Hui Chua,<sup>a,b</sup>

### Experimental Details & Procedures

All reagents were purchased from Sigma Aldrich unless otherwise stated. TAB.4HBr (Hangzhou Trylead Chemical Technology Co. Ltd.), Pd[PPh<sub>3</sub>]Cl<sub>2</sub> (Strem Chemicals Inc.). The Th<sub>2</sub>-BBTa isomers,<sup>1</sup> Th<sub>2</sub>-SBTa<sup>2</sup> and Th<sub>2</sub>-BBT<sup>3</sup> were synthesized using literature procedures. <sup>1</sup>H and <sup>13</sup>C NMR were performed on JEOL 500MHz NMR system with chemical shifts referenced to the deuterated solvent. Matrix assisted laser desorption/ionization time-of-flight (MALDI-TOF) mass spectra were obtained on a Bruker Daltonics Autoflex II TOF/TOF system. Elemental analysis was carried out using CHNS FlashEA 1112 Elemental Analyzer from Thermo Fisher Scientific. UV-Vis absorption spectra were recorded on a Shimadzu UV-3101PC UV-VIS-NIR Spectrophotometer. Cyclic voltammetry (CV) experiments were performed using Autolab potentiostat (model PGSTAT30) by Echochimie. All CV measurements of the Th<sub>2</sub>-BBTa small molecules were recorded in dry chloroform with 0.1 M tetrabutylammonium hexafluorophosphate as supporting electrolyte (scan rate of 100 mV•s<sup>-1</sup>). Ferrocene was used as external standard (onset of oxidation was taken to be -4.8 eV). Fluorescence measurements were measured using Shimadzu RF-5301 PC spectrofluorophotometer and chloroform as solvent. Φ<sub>f</sub> of the compounds were measured in chloroform using perylene (Φ<sub>f</sub> = 0.94 in cyclohexane)<sup>4</sup> as actinometer for **Th<sub>2</sub>-BBTa17** and **Th<sub>2</sub>-BBTa15**, N,N'-bis(1-ethylpropyl)-3,4:9,10-perylene-bis(dicarboximide) (Φ<sub>f</sub> = 0.98 in dichloromethane)<sup>5</sup> for **Th<sub>2</sub>-BBTa26** and **Th<sub>2</sub>-BBTa16**, and zinc phthalocyanine (Φ<sub>f</sub> = 0.23 in THF) for **Th<sub>2</sub>-SBTa**. For single crystal XRD, a suitable crystal was selected and mounted in inert oil and transferred to the cold gas stream of a Bruker AXS SMART APEXII CCD diffractometer. The crystal was kept at about 100 K for **Th<sub>2</sub>-BBTa17** and **Th<sub>2</sub>-BBTa15** while 250 K for **Th<sub>2</sub>-BBTa26** during data collection. Using Olex2<sup>6</sup>, the structure was solved with the XM<sup>7</sup> structure solution program using Dual Space and refined with the ShelXL<sup>7</sup> refinement package using Least Squares minimization.

## Synthesis of all four Th<sub>2</sub>-BBTa isomers.

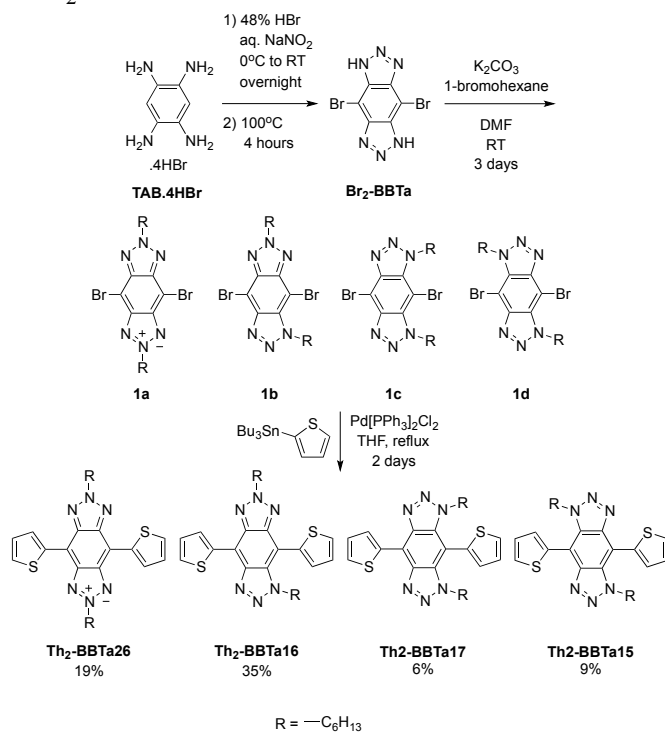

21 g of TAB.4HBr (45.5 mmol) was added to 300 mL of 48 % aq. HBr and allowed to cool down to 0° C. 31.38 g of NaNO<sub>2</sub> (454.7 mmol) was dissolved in 500 mL of deionized water and was added dropwisely to the reaction mixture using an additional funnel in air. Brown gas evolved upon addition of NaNO<sub>2</sub> solution. After addition of NaNO<sub>2</sub> solution, the reaction was allowed to warm up to room temperature overnight. The reaction mixture was heated to 100 °C for 4 hours and then cooled down to room temperature where the resulting precipitate of Br<sub>2</sub>-BBTa was filtered, washed excessively with deionized water and dried. The crude Br<sub>2</sub>-BBTa was used for the next step without further purification. The crude Br<sub>2</sub>-BBTa, 15.06 g of anhydrous K<sub>2</sub>CO<sub>3</sub> (109.0 mmol) and 14.04 mL of 1-bromohexane (100.0 mmol) was added to 90 mL of DMF and the reaction mixture was allowed to stir at room temperature for 3 days under N<sub>2</sub> environment. The reaction mixture was added to 500 mL of water and extracted using dichloromethane. The organic layer was collected, dried over anhydrous MgSO<sub>4</sub>, and stripped from all volatiles. The residue was forced through a short silica column using dichloromethane as the eluent to yield the crude isomers **1a-d**. These isomers could not be well separated at this point of time. To the crude mixture under N<sub>2</sub> environment, 28.9 mL of 2-(tributylstannyl)thiophene (91.0 mmol), 958 mg of Pd[PPh<sub>3</sub>]<sub>2</sub>Cl<sub>2</sub> (1.36 mmol) and 200 mL of THF were added and the reaction was heated under reflux for 2 days. The reaction mixture was cooled to room temperature and most of the volatiles removed under vacuum. The residue was dry loaded into a silica column with hexane as the eluent. 4.2 g of **Th<sub>2</sub>-BBTa26** (19 % yield, red crystalline solids, hexane to hexane: dichloromethane 80:20), 7.81 g of **Th<sub>2</sub>-BBTa16** (35 % yield, orange waxy solids, hexane: dichloromethane 80:20 to hexane: dichloromethane 60:40), 1.40 g of **Th<sub>2</sub>-BBTa17** (6 % yield, yellow solids, hexane: dichloromethane 60:40 to hexane: dichloromethane 30:70) and 2.35 g of **Th<sub>2</sub>-BBTa15** (9 % yield, yellow solids, hexane: dichloromethane 30:70 to pure dichloromethane) were obtained.

**Th<sub>2</sub>-BBTa26.** <sup>1</sup>H NMR (CDCl<sub>3</sub>): δ, [ppm] 0.90 (t, 6 H, J = 7.3 Hz), 1.34-1.52 (m, 4 H), 2.30 (quintet, 4 H, J = 7.4 Hz), 4.94 (t, 4 H, J = 7.3 Hz), 7.29 (dd, 2H, J = 4.0, 5.0 Hz), 7.55 (dd, 2 H, J = 1.0, 5.0 Hz), 8.72 (dd, 2 H, J = 1.0, 5.0 Hz). <sup>13</sup>C NMR (CDCl<sub>3</sub>): δ, [ppm] 14.16, 22.64, 26.49, 30.15, 31.39, 31.22, 57.96, 109.94, 127.83, 128.05, 129.71, 137.26, 141.39. Anal. Calcd for C<sub>26</sub>H<sub>32</sub>N<sub>6</sub>S<sub>2</sub>: C, 63.38; H, 6.55; N, 17.06; S, 13.02. Found: C, 63.68; H, 6.71; N, 16.88. MALDI-TOF-MS m/z: 492.23 (M<sup>+</sup>); calcd. for C<sub>26</sub>H<sub>32</sub>N<sub>6</sub>S<sub>2</sub> = 492.70.

**Th<sub>2</sub>-BBTa16.** <sup>1</sup>H NMR (CDCl<sub>3</sub>): δ, [ppm] 0.80 (t, 3 H, J = 7.0 Hz), 0.87 (t, 3 H, J = 7.0 Hz), 1.06-1.20 (m, 6 H), 1.30-1.43 (m, 6 H), 1.57 (quintet, 2 H, J = 7.5 Hz), 2.18 (quintet, 2 H, J = 7.4), 4.50 (t, 2 H, J = 7.5 Hz), 4.82 (t, 2 H, J = 7.5 Hz), 7.25 (dd, 1H, J = 3.5, 5.0 Hz), 7.28-7.31 (m, 2 H), 7.60 (dd, 1 H, J = 1.0 Hz, 5.0 Hz), 7.63 (dd, 1 H, J = 1.0 Hz, 5.0 Hz), 8.93 (dd, 1 H, J = 1.0, 4.0 Hz). <sup>13</sup>C NMR (CDCl<sub>3</sub>): δ, [ppm] 14.03, 14.06, 22.45, 22.52, 26.15, 26.30, 30.15, 30.22, 31.19, 31.24, 50.03, 57.80, 100.94, 114.80, 127.15, 127.73, 127.88, 129.74, 129.82, 131.36, 131.80, 133.39, 135.64, 139.09, 142.57, 145.66. Anal. Calcd for C<sub>26</sub>H<sub>32</sub>N<sub>6</sub>S<sub>2</sub>: C, 63.38; H, 6.55; N, 17.06; S, 13.02. Found: C, 63.57; H, 6.50; N, 16.66. MALDI-TOF-MS m/z: 493.18 (M+H<sup>+</sup>); calcd. for C<sub>26</sub>H<sub>32</sub>N<sub>6</sub>S<sub>2</sub> = 492.70.

**Th<sub>2</sub>-BBTa17.** <sup>1</sup>H NMR (CDCl<sub>3</sub>): δ, [ppm] 0.80 (t, 6 H, J = 7.3 Hz), 1.06-1.21 (m, 12 H), 1.64-1.69 (doublet of quintet, 4 H, J = 2.5, 7.6 Hz), 4.04 (doublet of multiplet, 2 H), 7.22-7.24 (m, 1H), 7.26-7.28 (m, 2 H), 7.61 (dd, 1 H, J = 1.3, 5.0 Hz), 7.63 (dd, 1 H, J = 1.5, 5.0 Hz), 9.12 (dd, 1 H, J = 1.0, 4.0 Hz). <sup>13</sup>C NMR (CDCl<sub>3</sub>): δ, [ppm] 14.05, 22.52, 26.40, 30.88, 31.28, 49.49, 92.74, 117.69, 127.56, 127.81, 128.73, 130.78, 131.44, 131.96, 133.31, 133.39, 134.60, 140.72. Anal. Calcd for C<sub>26</sub>H<sub>32</sub>N<sub>6</sub>S<sub>2</sub>: C, 63.38; H, 6.55; N, 17.06; S, 13.02. Found: C, 63.56; H, 6.57; N, 17.07. MALDI-TOF-MS m/z: 493.20 (M+H<sup>+</sup>); calcd. for C<sub>26</sub>H<sub>32</sub>N<sub>6</sub>S<sub>2</sub> = 492.70.

**Th<sub>2</sub>-BBTa15.** <sup>1</sup>H NMR (CDCl<sub>3</sub>): δ, [ppm] 0.82 (t, 6 H, J = 7.3 Hz), 1.07-1.21 (m, 12 H), 1.58 (quintet, 4 H, J = 7.4 Hz), 4.56 (t, 4 H, J = 7.8), 7.30 (dd, 2H, J = 3.5, 5.5 Hz), 7.37 (dd, 2 H, J = 1.0, 3.5 Hz), 7.67 (dd, 2 H, J = 1.3, 5.3 Hz). <sup>13</sup>C NMR (CDCl<sub>3</sub>): δ, [ppm] 14.08, 22.51, 26.22, 30.51, 31.23, 50.40, 107.14, 127.37, 128.59, 129.36, 130.50, 131.85, 146.97. Anal. Calcd for C<sub>26</sub>H<sub>32</sub>N<sub>6</sub>S<sub>2</sub>: C, 63.38; H, 6.55; N, 17.06; S, 13.02. Found: C, 63.58; H, 6.62; N, 16.98. MALDI-TOF-MS m/z: 492.68 (M<sup>+</sup>); calcd. for C<sub>26</sub>H<sub>32</sub>N<sub>6</sub>S<sub>2</sub> = 492.70.

Single crystal growth of **Th<sub>2</sub>-BBT**, **Th<sub>2</sub>-BBTa26**, **Th<sub>2</sub>-BBTa17** and **Th<sub>2</sub>-BBTa15**. For **Th<sub>2</sub>-BBTa17** and **Th<sub>2</sub>-BBTa15**, the solids were separately heated in hot hexane and dichloromethane was added until all solids were dissolved. For **Th<sub>2</sub>-BBTa26**, the solids were heated in hot ethanol and toluene was added until all solids were dissolved. The solutions were allowed to crystallize upon standing. **Th<sub>2</sub>-BBTa26** red needles. **Th<sub>2</sub>-BBTa17** yellow platelets. **Th<sub>2</sub>-BBTa15** light yellow needles. No crystals of **Th<sub>2</sub>-BBTa16** could be grown as it is a waxy solid.

Crystal Data for **Th<sub>2</sub>-BBTa26** (*M* = 492.69): trigonal, space group R-3 (no. 148), *a* = 37.196(3) Å, *c* = 5.4457(9) Å, *V* = 6525.1(15) Å<sup>3</sup>, *Z* = 9, *T* = 250(2) K, μ(CuKα) = 1.839 mm<sup>-1</sup>, *D*<sub>calc</sub> = 1.128 g/mm<sup>3</sup>, 4864 reflections measured (16.508 ≤ 2θ ≤ 110.09), 1791

unique ( $R_{\text{int}} = 0.0326$ ,  $R_{\text{sigma}} = 0.0372$ ) which were used in all calculations. The final  $R_1$  was 0.0400 ( $I > 2\sigma(I)$ ) and  $wR_2$  was 0.1155 (all data).

Crystal Data for **Th<sub>2</sub>-BBTa17** ( $M = 492.69$ ): triclinic, space group P-1 (no. 2),  $a = 9.6442(3)$  Å,  $b = 13.9072(4)$  Å,  $c = 19.3218(6)$  Å,  $\alpha = 80.5235(16)^\circ$ ,  $\beta = 89.0924(16)^\circ$ ,  $\gamma = 79.1833(15)^\circ$ ,  $V = 2510.43(13)$  Å<sup>3</sup>,  $Z = 4$ ,  $T = 100.07$  K,  $\mu(\text{MoK}\alpha) = 0.239$  mm<sup>-1</sup>,  $D_{\text{calc}} = 1.304$  g/mm<sup>3</sup>, 189236 reflections measured ( $2.138 \leq 2\theta \leq 70.03$ ), 22113 unique ( $R_{\text{int}} = 0.0729$ ,  $R_{\text{sigma}} = 0.0335$ ) which were used in all calculations. The final  $R_1$  was 0.0499 ( $I > 2\sigma(I)$ ) and  $wR_2$  was 0.1292 (all data). Refinement Details. The sulfur and disordered carbon atoms were refined with group anisotropic displacement parameters. Distance restraints were imposed on the disorder. 3 reflections were removed because they were behind the beam stop.

Crystal Data for **Th<sub>2</sub>-BBTa15** ( $M = 492.69$ ): monoclinic, space group P2<sub>1</sub>/n (no. 14),  $a = 20.6046(8)$  Å,  $b = 5.8783(2)$  Å,  $c = 20.9113(8)$  Å,  $\beta = 97.134(2)^\circ$ ,  $V = 2513.17(16)$  Å<sup>3</sup>,  $Z = 4$ ,  $T = 100.03$  K,  $\mu(\text{MoK}\alpha) = 0.239$  mm<sup>-1</sup>,  $D_{\text{calc}} = 1.302$  g/mm<sup>3</sup>, 121995 reflections measured ( $5.98 \leq 2\theta \leq 73.05$ ), 12190 unique ( $R_{\text{int}} = 0.0634$ ,  $R_{\text{sigma}} = 0.0330$ ) which were used in all calculations. The final  $R_1$  was 0.0498 ( $I > 2\sigma(I)$ ) and  $wR_2$  was 0.1270 (all data).

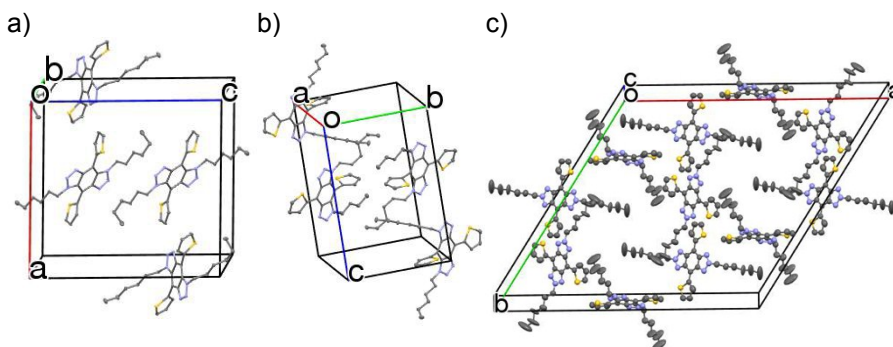

**S1.** XRD single crystal structure of a) **Th<sub>2</sub>-BBTa15**, b) **Th<sub>2</sub>-BBTa17** and c) **Th<sub>2</sub>-BBTa26**. Blue – Nitrogen, Grey – Carbon, Yellow – Sulphur. Hydrogens are omitted for clarity. Disordered thiophene and hexyl groups are omitted for clarity. Thermal ellipsoids drawn at 50% probability.

### DFT Calculations

All calculations were carried using Gaussian 09, Revision A.02 package. The ground states were geometry optimized to the global minimum using DFT RB3LYP 6-31G (d,p) level of theory. TDDFT calculations were performed on these structures to calculate the energies of  $S_1^{\text{GS}}$  and  $T_1^{\text{GS}}$ . The SES geometries were optimized from the ground state geometry using TDDFT. The energies of  $S_1^{\text{SES}}$  and  $T_1^{\text{SES}}$ , as well as the NPA atomic charges of the excited states (using keyword density=current) were also calculated in this step. Wavefunction stability checks were performed on all calculated geometries. When there is RHF→UHF instability, the geometries were re-optimized using UB3LYP. TDDFT calculations were performed on these re-optimized structures (using keyword

guess=mix). Single-point calculations using solvation model (IEFPCM, solvent = chloroform) were performed on the optimized geometries.

Note, TDDFT geometry optimization of the SES geometries for Th<sub>2</sub>-SBTA and Th<sub>2</sub>-BBT do not converge when guess=mix is used. To ensure convergence, TDDFT geometry optimization were carried out without the using the keyword guess=mix. A subsequent single-point energy TDDFT calculation on the optimized SES geometry with the keyword guess=mix was carried out to obtain the electronic transitions. Wavefunction stability check on the optimized SES geometry also includes the keyword guess=mix. Without it, there is an internal instability and wavefunction optimization automatically initiates orbital mixing to give the same solution (total energy) as single-point energy TDDFT calculation with guess=mix.

Excitation energies and oscillator strengths for **Th<sub>2</sub>-SBTa** SES geometry (restricted):

Excited State 1: Triplet-A" -0.4603 eV -2693.62 nm f=-0.0000 <S\*\*2>=2.000  
91 -> 92 0.73334  
91 <- 92 0.22435

This state for optimization and/or second-order correction.

Copying the excited state density for this state as the 1-particle RhoCI density.

Excited State 2: Singlet-A" 1.2922 eV 959.50 nm f=0.3673 <S\*\*2>=0.000  
91 -> 92 0.71530  
91 <- 92 -0.13968

Excited State 3: Triplet-A' 2.3168 eV 535.15 nm f=0.0000 <S\*\*2>=2.000  
88 -> 92 -0.10271  
90 -> 92 0.66979  
91 -> 96 0.16078

Excitation energies and oscillator strengths for **Th<sub>2</sub>-SBTa** SES geometry (unrestricted, guess=mix):

Excited state symmetry could not be determined.

Excited State 1: 2.368-?Sym 0.6962 eV 1780.82 nm f=0.0005 <S\*\*2>=1.152

91A -> 92A 0.71797

91B -> 92B 0.71797

91A <- 92A 0.16234

91B <- 92B 0.16234

This state for optimization and/or second-order correction.

Copying the excited state density for this state as the 1-particle RhoCI density.

Excited state symmetry could not be determined.

Excited State 2: 0.969-?Sym 1.3799 eV 898.50 nm f=0.3205 <S\*\*2>=-0.015

91A -> 92A 0.70418

91B -> 92B -0.70418

Excited state symmetry could not be determined.

Excited State 3: 2.795-?Sym 2.4637 eV 503.24 nm f=0.0116 <S\*\*2>=1.704

90A -> 92A 0.65124

91A -> 95A 0.16892

90B -> 92B -0.65124

91B -> 95B -0.16892

Excitation energies and oscillator strengths for **Th<sub>2</sub>-BBT** GS geometry (restricted):

Excited State 1: Triplet-BU -0.2429 eV -5104.87 nm f=-0.0000 <S\*\*2>=2.000  
87 -> 92 -0.15261  
91 -> 92 0.86105  
87 <- 92 -0.12303  
91 <- 92 0.50785

This state for optimization and/or second-order correction.

Copying the excited state density for this state as the 1-particle RhoCI density.

Excited State 2: Singlet-BU 1.3796 eV 898.70 nm f=0.2776 <S\*\*2>=0.000  
91 -> 92 0.71427  
91 <- 92 -0.13193  
Excited State 3: Triplet-AG 2.2405 eV 553.38 nm f=0.0000 <S\*\*2>=2.000  
88 -> 92 -0.18156  
90 -> 92 0.66254  
91 -> 95 0.11013



Excitation energies and oscillator strengths for **Th<sub>2</sub>-BBT** GS geometry (unrestricted, guess=mix):

Excited state symmetry could not be determined.

Excited State 1: 2.638-?Sym 0.4837 eV 2563.47 nm f=0.0000 <S\*\*2>=1.489

87A -> 92A 0.10544

91A -> 92A 0.74477

87B -> 92B 0.10544

91B -> 92B 0.74477

91A <- 92A 0.26250

91B <- 92B 0.26250

This state for optimization and/or second-order correction.

Copying the excited state density for this state as the 1-particle RhoCI density.

Excited state symmetry could not be determined.

Excited State 2: 0.955-?Sym 1.3738 eV 902.49 nm f=0.2545 <S\*\*2>=-0.022

91A -> 92A 0.70908

91B -> 92B -0.70908

91A <- 92A -0.10622

91B <- 92B 0.10622

Excited state symmetry could not be determined.

Excited State 3: 2.908-?Sym 2.2995 eV 539.18 nm f=0.0123 <S\*\*2>=1.865

88A -> 92A -0.12700

89A -> 92A -0.11567

90A -> 92A 0.66060

91A -> 95A 0.11561

88B -> 92B 0.12700

89B -> 92B 0.11567

90B -> 92B -0.66060

91B -> 95B -0.11561

Excitation energies and oscillator strengths for **Th<sub>2</sub>-BBT** SES geometry (restricted):

Excited State 1: Triplet-BU -0.5076 eV -2442.70 nm f=-0.0000 <S\*\*2>=2.000  
91 -> 92 0.70355

This state for optimization and/or second-order correction.

Copying the excited state density for this state as the 1-particle RhoCI density.

Excited State 2: Singlet-BU 1.0200 eV 1215.57 nm f=0.2487 <S\*\*2>=0.000  
91 -> 92 0.72170  
91 <- 92 -0.16071

Excited State 3: Triplet-AG 2.0632 eV 600.93 nm f=0.0000 <S\*\*2>=2.000  
88 -> 92 -0.15922  
90 -> 92 0.66994

Excitation energies and oscillator strengths for **Th<sub>2</sub>-BBT** SES geometry (unrestricted, guess=mix):

Excited state symmetry could not be determined.

Excited State 1: 2.016-?Sym 0.8750 eV 1416.92 nm f=0.0000 <S\*\*2>=0.766

91A -> 92A 0.70460

91B -> 92B 0.70460

This state for optimization and/or second-order correction.

Copying the excited state density for this state as the 1-particle RhoCI density.

Excited state symmetry could not be determined.

Excited State 2: 1.046-?Sym 1.2008 eV 1032.48 nm f=0.2036 <S\*\*2>=0.023

91A -> 92A -0.70191

91B -> 92B 0.70191

Excited state symmetry could not be determined.

Excited State 3: 2.657-?Sym 2.3616 eV 525.00 nm f=0.0517 <S\*\*2>=1.515

89A -> 92A 0.10729

90A -> 92A -0.65391

91A -> 94A 0.11706

91A -> 96A -0.12029

89B -> 92B -0.10729

90B -> 92B 0.65391

91B -> 94B -0.11706

91B -> 96B 0.12029

**Th<sub>2</sub>-BBTa15** GS geometry (restricted)

| Center<br>Number | Atomic<br>Number | Atomic<br>Type | Coordinates (Angstroms) |           |           |
|------------------|------------------|----------------|-------------------------|-----------|-----------|
|                  |                  |                | X                       | Y         | Z         |
| 1                | 6                | 0              | 0.745704                | -1.154082 | 0.044613  |
| 2                | 6                | 0              | 1.494572                | 0.035255  | 0.092686  |
| 3                | 6                | 0              | 0.680512                | 1.184984  | 0.057630  |
| 4                | 6                | 0              | -0.745705               | 1.154080  | 0.044655  |
| 5                | 6                | 0              | -1.494573               | -0.035259 | 0.092658  |
| 6                | 6                | 0              | -0.680513               | -1.184987 | 0.057562  |
| 7                | 7                | 0              | 1.087956                | 2.501341  | 0.010659  |
| 8                | 7                | 0              | 1.083205                | -2.485829 | -0.032108 |
| 9                | 7                | 0              | -1.087956               | -2.501342 | 0.010522  |
| 10               | 7                | 0              | -0.043604               | -3.253273 | -0.057333 |
| 11               | 6                | 0              | 2.956751                | 0.105726  | 0.197403  |
| 12               | 6                | 0              | 3.765624                | -0.506682 | 1.129913  |
| 13               | 6                | 0              | 5.149918                | -0.221813 | 0.958217  |
| 14               | 6                | 0              | 5.387252                | 0.607842  | -0.104234 |
| 15               | 6                | 0              | -2.956754               | -0.105736 | 0.197346  |
| 16               | 6                | 0              | 2.361276                | -3.143376 | -0.244814 |
| 17               | 16               | 0              | 3.922903                | 1.069833  | -0.900675 |
| 18               | 1                | 0              | 2.876870                | -2.708474 | -1.104005 |
| 19               | 1                | 0              | 2.138427                | -4.192339 | -0.439412 |
| 20               | 1                | 0              | 3.005820                | -3.058184 | 0.631849  |
| 21               | 1                | 0              | 3.369400                | -1.108846 | 1.939640  |
| 22               | 1                | 0              | 5.930587                | -0.607632 | 1.603425  |
| 23               | 1                | 0              | 6.335758                | 0.989234  | -0.456411 |
| 24               | 7                | 0              | 0.043605                | 3.253276  | -0.057177 |
| 25               | 7                | 0              | -1.083204               | 2.485830  | -0.032009 |
| 26               | 6                | 0              | -2.361272               | 3.143387  | -0.244702 |
| 27               | 1                | 0              | -2.138421               | 4.192359  | -0.439250 |
| 28               | 1                | 0              | -2.876855               | 2.708524  | -1.103919 |
| 29               | 1                | 0              | -3.005828               | 3.058156  | 0.631949  |
| 30               | 6                | 0              | -3.765645               | 0.506621  | 1.129874  |
| 31               | 6                | 0              | -5.149936               | 0.221763  | 0.958136  |
| 32               | 16               | 0              | -3.922887               | -1.069785 | -0.900802 |
| 33               | 6                | 0              | -5.387250               | -0.607835 | -0.104365 |
| 34               | 1                | 0              | -6.335750               | -0.989206 | -0.456580 |
| 35               | 1                | 0              | -5.930618               | 0.607548  | 1.603350  |
| 36               | 1                | 0              | -3.369437               | 1.108741  | 1.939641  |

**Th<sub>2</sub>-BBTa15** SES geometry (restricted)

| Center<br>Number | Atomic<br>Number | Atomic<br>Type | Coordinates (Angstroms) |           |           |
|------------------|------------------|----------------|-------------------------|-----------|-----------|
|                  |                  |                | X                       | Y         | Z         |
| 1                | 6                | 0              | 0.689731                | -1.207316 | -0.224236 |
| 2                | 6                | 0              | 1.498585                | -0.038141 | -0.069261 |
| 3                | 6                | 0              | 0.729422                | 1.169789  | -0.211701 |
| 4                | 6                | 0              | -0.689770               | 1.207379  | -0.224049 |
| 5                | 6                | 0              | -1.498613               | 0.038180  | -0.069134 |
| 6                | 6                | 0              | -0.729457               | -1.169731 | -0.211783 |
| 7                | 7                | 0              | 1.207954                | 2.427858  | -0.368508 |
| 8                | 7                | 0              | 0.959390                | -2.530330 | -0.434452 |
| 9                | 7                | 0              | -1.207986               | -2.427788 | -0.368707 |
| 10               | 7                | 0              | -0.209993               | -3.259473 | -0.524819 |
| 11               | 6                | 0              | 2.894275                | -0.014914 | 0.251783  |
| 12               | 6                | 0              | 3.643874                | -0.990779 | 0.920956  |
| 13               | 6                | 0              | 4.992388                | -0.639576 | 1.118220  |
| 14               | 6                | 0              | 5.295450                | 0.606922  | 0.610723  |
| 15               | 6                | 0              | -2.894268               | 0.014885  | 0.252070  |
| 16               | 6                | 0              | 2.188729                | -3.227868 | -0.770421 |
| 17               | 16               | 0              | 3.925927                | 1.388620  | -0.091437 |
| 18               | 1                | 0              | 2.869515                | -2.553800 | -1.290516 |
| 19               | 1                | 0              | 1.913688                | -4.057394 | -1.422028 |
| 20               | 1                | 0              | 2.687818                | -3.626341 | 0.117309  |
| 21               | 1                | 0              | 3.196804                | -1.893900 | 1.313776  |
| 22               | 1                | 0              | 5.711592                | -1.267827 | 1.631099  |
| 23               | 1                | 0              | 6.249049                | 1.117173  | 0.639410  |
| 24               | 7                | 0              | 0.209957                | 3.259569  | -0.524442 |
| 25               | 7                | 0              | -0.959425               | 2.530415  | -0.434164 |
| 26               | 6                | 0              | -2.188746               | 3.227996  | -0.770112 |
| 27               | 1                | 0              | -1.913678               | 4.057553  | -1.421669 |
| 28               | 1                | 0              | -2.869543               | 2.553976  | -1.290252 |
| 29               | 1                | 0              | -2.687832               | 3.626435  | 0.117634  |
| 30               | 6                | 0              | -3.643781               | 0.990562  | 0.921611  |
| 31               | 6                | 0              | -4.992321               | 0.639396  | 1.118767  |
| 32               | 16               | 0              | -3.925894               | -1.388683 | -0.091088 |
| 33               | 6                | 0              | -5.295486               | -0.606898 | 0.610832  |
| 34               | 1                | 0              | -6.249135               | -1.117066 | 0.639309  |
| 35               | 1                | 0              | -5.711498               | 1.267569  | 1.631780  |
| 36               | 1                | 0              | -3.196665               | 1.893562  | 1.314652  |

**Th<sub>2</sub>-BBTa17** GS geometry (restricted)

| Center<br>Number | Atomic<br>Number | Atomic<br>Type | Coordinates (Angstroms) |           |           |
|------------------|------------------|----------------|-------------------------|-----------|-----------|
|                  |                  |                | X                       | Y         | Z         |
| 1                | 6                | 0              | 0.429186                | -1.111943 | 0.090177  |
| 2                | 6                | 0              | 1.273649                | 0.012921  | 0.115792  |
| 3                | 6                | 0              | 0.537416                | 1.213629  | 0.088191  |
| 4                | 6                | 0              | -0.886661               | 1.294731  | 0.046231  |
| 5                | 6                | 0              | -1.728611               | 0.156053  | 0.023628  |
| 6                | 6                | 0              | -0.993781               | -1.048416 | 0.048781  |
| 7                | 7                | 0              | -1.236631               | 2.629398  | 0.036765  |
| 8                | 7                | 0              | 0.925623                | 2.527232  | 0.101433  |
| 9                | 7                | 0              | -1.481551               | -2.336707 | 0.039276  |
| 10               | 7                | 0              | 0.680115                | -2.458573 | 0.102257  |
| 11               | 7                | 0              | -0.495279               | -3.161121 | 0.069906  |
| 12               | 7                | 0              | -0.168727               | 3.346095  | 0.068601  |
| 13               | 6                | 0              | 2.748093                | -0.058541 | 0.173174  |
| 14               | 6                | 0              | -3.177232               | 0.225052  | -0.019782 |
| 15               | 6                | 0              | 3.561372                | -0.114470 | 1.278545  |
| 16               | 6                | 0              | 4.953689                | -0.179153 | 0.966828  |
| 17               | 6                | 0              | 5.194904                | -0.172892 | -0.378596 |
| 18               | 6                | 0              | -3.961224               | 1.368404  | -0.045616 |
| 19               | 6                | 0              | -5.351428               | 1.101373  | -0.086993 |
| 20               | 6                | 0              | -5.628922               | -0.241682 | -0.092837 |
| 21               | 6                | 0              | 2.244494                | 3.134202  | 0.133297  |
| 22               | 6                | 0              | 1.929754                | -3.197352 | 0.128447  |
| 23               | 16               | 0              | 3.722658                | -0.088424 | -1.290665 |
| 24               | 16               | 0              | -4.201217               | -1.211062 | -0.048000 |
| 25               | 1                | 0              | 2.523838                | -2.991709 | -0.765401 |
| 26               | 1                | 0              | 1.664498                | -4.254139 | 0.157211  |
| 27               | 1                | 0              | 2.516104                | -2.938382 | 1.012682  |
| 28               | 1                | 0              | 3.166454                | -0.107975 | 2.288506  |
| 29               | 1                | 0              | 5.737736                | -0.227762 | 1.713660  |
| 30               | 1                | 0              | 6.147539                | -0.213093 | -0.888668 |
| 31               | 1                | 0              | -6.598783               | -0.720126 | -0.121283 |
| 32               | 1                | 0              | -6.112032               | 1.872968  | -0.111452 |
| 33               | 1                | 0              | -3.525152               | 2.358254  | -0.034254 |
| 34               | 1                | 0              | 2.088265                | 4.212060  | 0.175360  |
| 35               | 1                | 0              | 2.801642                | 2.805789  | 1.013120  |
| 36               | 1                | 0              | 2.813788                | 2.880128  | -0.764137 |

**Th<sub>2</sub>-BBTa17** SES geometry (restricted)

| Center<br>Number | Atomic<br>Number | Atomic<br>Type | Coordinates (Angstroms) |           |           |
|------------------|------------------|----------------|-------------------------|-----------|-----------|
|                  |                  |                | X                       | Y         | Z         |
| 1                | 6                | 0              | -0.408269               | -1.160222 | -0.115723 |
| 2                | 6                | 0              | -1.275099               | -0.023916 | -0.126839 |
| 3                | 6                | 0              | -0.551494               | 1.209613  | -0.100194 |
| 4                | 6                | 0              | 0.865308                | 1.313287  | -0.047898 |
| 5                | 6                | 0              | 1.727155                | 0.161238  | -0.022565 |
| 6                | 6                | 0              | 1.007813                | -1.078062 | -0.065375 |
| 7                | 7                | 0              | 1.207624                | 2.627861  | -0.095212 |
| 8                | 7                | 0              | -0.955294               | 2.508129  | -0.207882 |
| 9                | 7                | 0              | 1.519250                | -2.332833 | -0.003390 |
| 10               | 7                | 0              | -0.643243               | -2.502517 | -0.058435 |
| 11               | 7                | 0              | 0.540755                | -3.204979 | -0.000651 |
| 12               | 7                | 0              | 0.123612                | 3.359189  | -0.191729 |
| 13               | 6                | 0              | -2.726432               | -0.131096 | -0.142800 |
| 14               | 6                | 0              | 3.143871                | 0.247800  | 0.033604  |
| 15               | 6                | 0              | -3.537936               | -0.732701 | -1.090574 |
| 16               | 6                | 0              | -4.921875               | -0.691328 | -0.776848 |
| 17               | 6                | 0              | -5.180029               | -0.067598 | 0.417251  |
| 18               | 6                | 0              | 3.932085                | 1.414863  | 0.078362  |
| 19               | 6                | 0              | 5.309104                | 1.151834  | 0.127015  |
| 20               | 6                | 0              | 5.602318                | -0.201309 | 0.120380  |
| 21               | 6                | 0              | -2.264390               | 3.101687  | -0.409695 |
| 22               | 6                | 0              | -1.870793               | -3.272086 | 0.024222  |
| 23               | 16               | 0              | -3.726517               | 0.475624  | 1.187323  |
| 24               | 16               | 0              | 4.192387                | -1.194997 | 0.055894  |
| 25               | 1                | 0              | -2.517494               | -2.882293 | 0.812973  |
| 26               | 1                | 0              | -1.573900               | -4.294109 | 0.258791  |
| 27               | 1                | 0              | -2.417905               | -3.258458 | -0.921323 |
| 28               | 1                | 0              | -3.138805               | -1.146644 | -2.009535 |
| 29               | 1                | 0              | -5.698088               | -1.091877 | -1.418711 |
| 30               | 1                | 0              | -6.138547               | 0.104940  | 0.887385  |
| 31               | 1                | 0              | 6.581326                | -0.661449 | 0.153761  |
| 32               | 1                | 0              | 6.069602                | 1.923520  | 0.165164  |
| 33               | 1                | 0              | 3.478438                | 2.397137  | 0.069288  |
| 34               | 1                | 0              | -2.092551               | 4.107427  | -0.792848 |
| 35               | 1                | 0              | -2.835144               | 2.517886  | -1.134323 |
| 36               | 1                | 0              | -2.827804               | 3.157904  | 0.525062  |

**Th<sub>2</sub>-BBTa16** GS geometry (restricted)

| Center<br>Number | Atomic<br>Number | Atomic<br>Type | Coordinates (Angstroms) |           |           |
|------------------|------------------|----------------|-------------------------|-----------|-----------|
|                  |                  |                | X                       | Y         | Z         |
| 1                | 6                | 0              | 0.696806                | -1.315932 | -0.000870 |
| 2                | 6                | 0              | 1.404090                | -0.108229 | 0.065935  |
| 3                | 6                | 0              | 0.534496                | 1.010862  | 0.052609  |
| 4                | 6                | 0              | -0.898611               | 0.912924  | 0.030098  |
| 5                | 6                | 0              | -1.608539               | -0.316989 | 0.012763  |
| 6                | 6                | 0              | -0.734348               | -1.422507 | -0.013308 |
| 7                | 7                | 0              | -1.399744               | 2.172762  | 0.051200  |
| 8                | 7                | 0              | 0.862906                | 2.325912  | 0.090952  |
| 9                | 7                | 0              | 1.104609                | -2.626952 | -0.091360 |
| 10               | 7                | 0              | -1.058819               | -2.764127 | -0.092978 |
| 11               | 7                | 0              | -0.317328               | 2.929594  | 0.087689  |
| 12               | 7                | 0              | 0.022672                | -3.456590 | -0.148149 |
| 13               | 6                | 0              | 2.860117                | 0.024164  | 0.185960  |
| 14               | 6                | 0              | 3.687963                | -0.510867 | 1.147707  |
| 15               | 6                | 0              | 5.061221                | -0.171668 | 0.975378  |
| 16               | 6                | 0              | 5.274282                | 0.626622  | -0.114837 |
| 17               | 6                | 0              | -3.055243               | -0.426791 | 0.012278  |
| 18               | 6                | 0              | -3.816199               | -1.585152 | -0.008690 |
| 19               | 6                | 0              | -5.213222               | -1.347443 | -0.000769 |
| 20               | 6                | 0              | -5.523232               | -0.012594 | 0.026602  |
| 21               | 6                | 0              | -0.414113               | 4.380523  | 0.056118  |
| 22               | 6                | 0              | 2.421885                | -3.208206 | -0.278217 |
| 23               | 16               | 0              | 3.798030                | 0.982074  | -0.947343 |
| 24               | 16               | 0              | -4.113113               | 0.985536  | 0.043103  |
| 25               | 1                | 0              | -3.358868               | -2.565041 | -0.031405 |
| 26               | 1                | 0              | -5.956870               | -2.135783 | -0.014932 |
| 27               | 1                | 0              | -6.503278               | 0.444851  | 0.037867  |
| 28               | 1                | 0              | 0.405108                | 4.791301  | 0.645103  |
| 29               | 1                | 0              | -1.377693               | 4.663677  | 0.476535  |
| 30               | 1                | 0              | -0.339586               | 4.736783  | -0.974898 |
| 31               | 1                | 0              | 2.929708                | -2.742484 | -1.126086 |
| 32               | 1                | 0              | 2.265655                | -4.268234 | -0.478163 |
| 33               | 1                | 0              | 3.042240                | -3.085914 | 0.611681  |
| 34               | 1                | 0              | 3.310921                | -1.098639 | 1.977061  |
| 35               | 1                | 0              | 5.851334                | -0.496849 | 1.642382  |
| 36               | 1                | 0              | 6.208468                | 1.038084  | -0.471329 |



**Th<sub>2</sub>-BBTa16** SES geometry (restricted)

| Center<br>Number | Atomic<br>Number | Atomic<br>Type | Coordinates (Angstroms) |           |           |
|------------------|------------------|----------------|-------------------------|-----------|-----------|
|                  |                  |                | X                       | Y         | Z         |
| 1                | 6                | 0              | 0.678507                | -1.390402 | -0.151500 |
| 2                | 6                | 0              | 1.415701                | -0.165855 | -0.074046 |
| 3                | 6                | 0              | 0.563013                | 0.988597  | -0.156485 |
| 4                | 6                | 0              | -0.866203               | 0.916481  | -0.079337 |
| 5                | 6                | 0              | -1.588668               | -0.312606 | 0.013345  |
| 6                | 6                | 0              | -0.740777               | -1.469769 | -0.066373 |
| 7                | 7                | 0              | -1.357227               | 2.167487  | -0.085027 |
| 8                | 7                | 0              | 0.927014                | 2.275080  | -0.218536 |
| 9                | 7                | 0              | 1.051343                | -2.688419 | -0.346083 |
| 10               | 7                | 0              | -1.109971               | -2.776386 | -0.167838 |
| 11               | 7                | 0              | -0.252046               | 2.938254  | -0.150893 |
| 12               | 7                | 0              | -0.053225               | -3.518597 | -0.348528 |
| 13               | 6                | 0              | 2.820693                | -0.054252 | 0.187110  |
| 14               | 6                | 0              | 3.653394                | -0.952890 | 0.863276  |
| 15               | 6                | 0              | 4.988009                | -0.518684 | 0.981345  |
| 16               | 6                | 0              | 5.197355                | 0.716496  | 0.406382  |
| 17               | 6                | 0              | -3.007945               | -0.392340 | 0.124623  |
| 18               | 6                | 0              | -3.798657               | -1.547560 | 0.210737  |
| 19               | 6                | 0              | -5.174295               | -1.276985 | 0.322549  |
| 20               | 6                | 0              | -5.457044               | 0.073521  | 0.321982  |
| 21               | 6                | 0              | -0.334329               | 4.356527  | -0.403167 |
| 22               | 6                | 0              | 2.309145                | -3.280265 | -0.770230 |
| 23               | 16               | 0              | 3.753000                | 1.384187  | -0.261979 |
| 24               | 16               | 0              | -4.041679               | 1.050253  | 0.182733  |
| 25               | 1                | 0              | -3.355205               | -2.534002 | 0.182993  |
| 26               | 1                | 0              | -5.935413               | -2.044905 | 0.400108  |
| 27               | 1                | 0              | -6.428446               | 0.544433  | 0.396568  |
| 28               | 1                | 0              | 0.568818                | 4.827448  | -0.013609 |
| 29               | 1                | 0              | -1.215415               | 4.745971  | 0.108298  |
| 30               | 1                | 0              | -0.418184               | 4.567538  | -1.477070 |
| 31               | 1                | 0              | 2.875165                | -2.565147 | -1.367751 |
| 32               | 1                | 0              | 2.058984                | -4.154095 | -1.371934 |
| 33               | 1                | 0              | 2.919617                | -3.597923 | 0.079066  |
| 34               | 1                | 0              | 3.276542                | -1.861046 | 1.314083  |
| 35               | 1                | 0              | 5.764053                | -1.081546 | 1.487116  |
| 36               | 1                | 0              | 6.119734                | 1.280209  | 0.367149  |

**Th<sub>2</sub>-BBTa26** GS geometry (restricted)

| Center<br>Number | Atomic<br>Number | Atomic<br>Type | Coordinates (Angstroms) |           |           |
|------------------|------------------|----------------|-------------------------|-----------|-----------|
|                  |                  |                | X                       | Y         | Z         |
| 1                | 6                | 0              | -0.573824               | 1.252793  | -0.005155 |
| 2                | 6                | 0              | -1.511988               | 0.190113  | -0.000856 |
| 3                | 6                | 0              | -0.857956               | -1.064690 | 0.004190  |
| 4                | 6                | 0              | 0.573823                | -1.252792 | 0.005155  |
| 5                | 6                | 0              | 1.511987                | -0.190113 | 0.000855  |
| 6                | 6                | 0              | 0.857956                | 1.064691  | -0.004190 |
| 7                | 7                | 0              | 0.809514                | -2.592421 | 0.015525  |
| 8                | 7                | 0              | -1.435333               | -2.293973 | 0.013637  |
| 9                | 7                | 0              | 1.435332                | 2.293974  | -0.013637 |
| 10               | 7                | 0              | -0.809515               | 2.592421  | -0.015524 |
| 11               | 7                | 0              | -0.403649               | -3.117585 | 0.023305  |
| 12               | 7                | 0              | 0.403649                | 3.117585  | -0.023305 |
| 13               | 6                | 0              | -2.948410               | 0.375749  | -0.001177 |
| 14               | 6                | 0              | -3.647548               | 1.573303  | -0.004094 |
| 15               | 16               | 0              | -4.083189               | -0.976695 | 0.002423  |
| 16               | 6                | 0              | -5.056165               | 1.412097  | -0.003582 |
| 17               | 1                | 0              | -3.143552               | 2.529762  | -0.006491 |
| 18               | 6                | 0              | -5.439782               | 0.096948  | -0.000338 |
| 19               | 1                | 0              | -5.755565               | 2.240352  | -0.005497 |
| 20               | 1                | 0              | -6.443081               | -0.306796 | 0.000832  |
| 21               | 6                | 0              | 2.948410                | -0.375749 | 0.001177  |
| 22               | 6                | 0              | 3.647548                | -1.573303 | 0.004094  |
| 23               | 16               | 0              | 4.083190                | 0.976695  | -0.002423 |
| 24               | 6                | 0              | 5.056166                | -1.412098 | 0.003582  |
| 25               | 1                | 0              | 3.143552                | -2.529763 | 0.006491  |
| 26               | 6                | 0              | 5.439783                | -0.096948 | 0.000338  |
| 27               | 1                | 0              | 5.755565                | -2.240352 | 0.005497  |
| 28               | 1                | 0              | 6.443082                | 0.306796  | -0.000832 |
| 29               | 6                | 0              | -0.595770               | -4.558534 | -0.025362 |
| 30               | 6                | 0              | 0.595769                | 4.558534  | 0.025363  |
| 31               | 1                | 0              | -1.561662               | -4.785545 | 0.422931  |
| 32               | 1                | 0              | 0.213189                | -5.031377 | 0.530197  |
| 33               | 1                | 0              | -0.579165               | -4.901250 | -1.063492 |
| 34               | 1                | 0              | -0.213189               | 5.031378  | -0.530198 |
| 35               | 1                | 0              | 1.561661                | 4.785545  | -0.422929 |
| 36               | 1                | 0              | 0.579163                | 4.901251  | 1.063493  |

**Th<sub>2</sub>-BBTa26** SES geometry (restricted)

| Center<br>Number | Atomic<br>Number | Atomic<br>Type | Coordinates (Angstroms) |           |           |
|------------------|------------------|----------------|-------------------------|-----------|-----------|
|                  |                  |                | X                       | Y         | Z         |
| 1                | 6                | 0              | 0.560723                | -1.282088 | -0.012629 |
| 2                | 6                | 0              | 1.497887                | -0.196582 | -0.001837 |
| 3                | 6                | 0              | 0.863148                | 1.085147  | 0.010421  |
| 4                | 6                | 0              | -0.560724               | 1.282088  | 0.012629  |
| 5                | 6                | 0              | -1.497887               | 0.196582  | 0.001837  |
| 6                | 6                | 0              | -0.863148               | -1.085147 | -0.010421 |
| 7                | 7                | 0              | -0.803796               | 2.604297  | 0.032755  |
| 8                | 7                | 0              | 1.460528                | 2.287156  | 0.028966  |
| 9                | 7                | 0              | -1.460528               | -2.287156 | -0.028964 |
| 10               | 7                | 0              | 0.803796                | -2.604297 | -0.032756 |
| 11               | 7                | 0              | 0.428156                | 3.150681  | 0.065031  |
| 12               | 7                | 0              | -0.428157               | -3.150681 | -0.065032 |
| 13               | 6                | 0              | 2.911727                | -0.384512 | -0.002803 |
| 14               | 6                | 0              | 3.611666                | -1.598739 | -0.017115 |
| 15               | 16               | 0              | 4.059823                | 0.968273  | 0.015662  |
| 16               | 6                | 0              | 5.010175                | -1.441587 | -0.013338 |
| 17               | 1                | 0              | 3.093068                | -2.547460 | -0.030695 |
| 18               | 6                | 0              | 5.400050                | -0.119181 | 0.003702  |
| 19               | 1                | 0              | 5.710238                | -2.269176 | -0.022839 |
| 20               | 1                | 0              | 6.408798                | 0.272132  | 0.009920  |
| 21               | 6                | 0              | -2.911726               | 0.384512  | 0.002803  |
| 22               | 6                | 0              | -3.611665               | 1.598738  | 0.017115  |
| 23               | 16               | 0              | -4.059823               | -0.968273 | -0.015661 |
| 24               | 6                | 0              | -5.010175               | 1.441587  | 0.013337  |
| 25               | 1                | 0              | -3.093068               | 2.547460  | 0.030696  |
| 26               | 6                | 0              | -5.400049               | 0.119181  | -0.003704 |
| 27               | 1                | 0              | -5.710238               | 2.269176  | 0.022838  |
| 28               | 1                | 0              | -6.408797               | -0.272132 | -0.009924 |
| 29               | 6                | 0              | 0.627847                | 4.573997  | -0.070741 |
| 30               | 6                | 0              | -0.627847               | -4.573996 | 0.070741  |
| 31               | 1                | 0              | 1.577260                | 4.833264  | 0.398486  |
| 32               | 1                | 0              | -0.194475               | 5.087324  | 0.428905  |
| 33               | 1                | 0              | 0.652447                | 4.872266  | -1.126284 |
| 34               | 1                | 0              | 0.194474                | -5.087324 | -0.428906 |
| 35               | 1                | 0              | -1.577262               | -4.833263 | -0.398484 |
| 36               | 1                | 0              | -0.652445               | -4.872266 | 1.126285  |

**Th<sub>2</sub>-SBTa** GS geometry (restricted)

| Center<br>Number | Atomic<br>Number | Atomic<br>Type | Coordinates (Angstroms) |           |           |
|------------------|------------------|----------------|-------------------------|-----------|-----------|
|                  |                  |                | X                       | Y         | Z         |
| 1                | 6                | 0              | 0.083474                | -0.001695 | 1.525463  |
| 2                | 6                | 0              | -1.103602               | 0.002231  | 0.735899  |
| 3                | 6                | 0              | -1.103602               | 0.002231  | -0.735899 |
| 4                | 6                | 0              | 0.083474                | -0.001695 | -1.525463 |
| 5                | 6                | 0              | 1.247856                | -0.003467 | -0.723169 |
| 6                | 6                | 0              | 1.247856                | -0.003467 | 0.723169  |
| 7                | 7                | 0              | 2.547137                | -0.010146 | 1.131912  |
| 8                | 7                | 0              | 3.224326                | -0.016807 | 0.000000  |
| 9                | 7                | 0              | 2.547137                | -0.010146 | -1.131912 |
| 10               | 7                | 0              | -2.345724               | 0.006063  | -1.250256 |
| 11               | 16               | 0              | -3.392773               | 0.009103  | 0.000000  |
| 12               | 7                | 0              | -2.345724               | 0.006063  | 1.250256  |
| 13               | 6                | 0              | 0.100028                | -0.002422 | -2.973314 |
| 14               | 6                | 0              | 0.100028                | -0.002422 | 2.973314  |
| 15               | 6                | 0              | 1.212871                | -0.004043 | -3.804220 |
| 16               | 6                | 0              | 0.897042                | -0.005025 | -5.184716 |
| 17               | 6                | 0              | -0.453623               | -0.004160 | -5.417609 |
| 18               | 16               | 0              | -1.370807               | -0.001523 | -3.952555 |
| 19               | 16               | 0              | -1.370807               | -0.001523 | 3.952555  |
| 20               | 6                | 0              | -0.453623               | -0.004160 | 5.417609  |
| 21               | 6                | 0              | 0.897042                | -0.005025 | 5.184716  |
| 22               | 6                | 0              | 1.212871                | -0.004043 | 3.804220  |
| 23               | 6                | 0              | 4.678812                | 0.032834  | 0.000000  |
| 24               | 1                | 0              | 2.220016                | -0.004447 | -3.412552 |
| 25               | 1                | 0              | 1.642618                | -0.006348 | -5.971517 |
| 26               | 1                | 0              | -0.966312               | -0.004608 | -6.370058 |
| 27               | 1                | 0              | -0.966312               | -0.004608 | 6.370058  |
| 28               | 1                | 0              | 1.642618                | -0.006348 | 5.971517  |
| 29               | 1                | 0              | 2.220016                | -0.004447 | 3.412552  |
| 30               | 1                | 0              | 5.036244                | -0.469454 | 0.897616  |
| 31               | 1                | 0              | 5.013566                | 1.073585  | 0.000000  |
| 32               | 1                | 0              | 5.036244                | -0.469454 | -0.897616 |

**Th<sub>2</sub>-SBTa** SES geometry (restricted)

| Center<br>Number | Atomic<br>Number | Atomic<br>Type | Coordinates (Angstroms) |           |           |
|------------------|------------------|----------------|-------------------------|-----------|-----------|
|                  |                  |                | X                       | Y         | Z         |
| 1                | 6                | 0              | 0.082235                | -0.003045 | 1.524800  |
| 2                | 6                | 0              | -1.129614               | 0.002998  | 0.731189  |
| 3                | 6                | 0              | -1.129614               | 0.002998  | -0.731189 |
| 4                | 6                | 0              | 0.082235                | -0.003045 | -1.524800 |
| 5                | 6                | 0              | 1.293660                | -0.005215 | -0.713417 |
| 6                | 6                | 0              | 1.293660                | -0.005215 | 0.713417  |
| 7                | 7                | 0              | 2.563247                | -0.017055 | 1.131696  |
| 8                | 7                | 0              | 3.276077                | -0.038011 | 0.000000  |
| 9                | 7                | 0              | 2.563247                | -0.017055 | -1.131696 |
| 10               | 7                | 0              | -2.342939               | 0.009112  | -1.261003 |
| 11               | 16               | 0              | -3.451247               | 0.014758  | 0.000000  |
| 12               | 7                | 0              | -2.342939               | 0.009112  | 1.261003  |
| 13               | 6                | 0              | 0.091691                | -0.004950 | -2.941365 |
| 14               | 6                | 0              | 0.091691                | -0.004950 | 2.941365  |
| 15               | 6                | 0              | 1.219696                | -0.010716 | -3.784148 |
| 16               | 6                | 0              | 0.904359                | -0.010800 | -5.154682 |
| 17               | 6                | 0              | -0.452794               | -0.005274 | -5.387934 |
| 18               | 16               | 0              | -1.384242               | 0.000168  | -3.926796 |
| 19               | 16               | 0              | -1.384242               | 0.000168  | 3.926796  |
| 20               | 6                | 0              | -0.452794               | -0.005274 | 5.387934  |
| 21               | 6                | 0              | 0.904359                | -0.010800 | 5.154682  |
| 22               | 6                | 0              | 1.219696                | -0.010716 | 3.784148  |
| 23               | 6                | 0              | 4.720735                | 0.065577  | 0.000000  |
| 24               | 1                | 0              | 2.223856                | -0.015189 | -3.385066 |
| 25               | 1                | 0              | 1.647764                | -0.014901 | -5.943381 |
| 26               | 1                | 0              | -0.959446               | -0.004140 | -6.343954 |
| 27               | 1                | 0              | -0.959446               | -0.004140 | 6.343954  |
| 28               | 1                | 0              | 1.647764                | -0.014901 | 5.943381  |
| 29               | 1                | 0              | 2.223856                | -0.015189 | 3.385066  |
| 30               | 1                | 0              | 5.100102                | -0.429285 | 0.893968  |
| 31               | 1                | 0              | 5.039086                | 1.113383  | 0.000000  |
| 32               | 1                | 0              | 5.100102                | -0.429285 | -0.893968 |

**Th<sub>2</sub>-SBTa** SES geometry (unrestricted)

| Center<br>Number | Atomic<br>Number | Atomic<br>Type | Coordinates (Angstroms) |           |           |
|------------------|------------------|----------------|-------------------------|-----------|-----------|
|                  |                  |                | X                       | Y         | Z         |
| 1                | 6                | 0              | 0.082157                | -0.002930 | 1.524752  |
| 2                | 6                | 0              | -1.129623               | 0.003013  | 0.731165  |
| 3                | 6                | 0              | -1.129623               | 0.003013  | -0.731165 |
| 4                | 6                | 0              | 0.082157                | -0.002930 | -1.524752 |
| 5                | 6                | 0              | 1.293628                | -0.005089 | -0.713283 |
| 6                | 6                | 0              | 1.293628                | -0.005089 | 0.713283  |
| 7                | 7                | 0              | 2.563363                | -0.017012 | 1.131521  |
| 8                | 7                | 0              | 3.276052                | -0.037990 | 0.000000  |
| 9                | 7                | 0              | 2.563363                | -0.017012 | -1.131521 |
| 10               | 7                | 0              | -2.342953               | 0.008997  | -1.260964 |
| 11               | 16               | 0              | -3.451486               | 0.014425  | 0.000000  |
| 12               | 7                | 0              | -2.342953               | 0.008997  | 1.260964  |
| 13               | 6                | 0              | 0.091637                | -0.004789 | -2.941375 |
| 14               | 6                | 0              | 0.091637                | -0.004789 | 2.941375  |
| 15               | 6                | 0              | 1.219660                | -0.010343 | -3.784110 |
| 16               | 6                | 0              | 0.904395                | -0.010531 | -5.154728 |
| 17               | 6                | 0              | -0.452687               | -0.005311 | -5.388100 |
| 18               | 16               | 0              | -1.384162               | 0.000184  | -3.926959 |
| 19               | 16               | 0              | -1.384162               | 0.000184  | 3.926959  |
| 20               | 6                | 0              | -0.452687               | -0.005311 | 5.388100  |
| 21               | 6                | 0              | 0.904395                | -0.010531 | 5.154728  |
| 22               | 6                | 0              | 1.219660                | -0.010343 | 3.784110  |
| 23               | 6                | 0              | 4.720744                | 0.064746  | 0.000000  |
| 24               | 1                | 0              | 2.223841                | -0.014652 | -3.385127 |
| 25               | 1                | 0              | 1.647872                | -0.014542 | -5.943347 |
| 26               | 1                | 0              | -0.959243               | -0.004337 | -6.344176 |
| 27               | 1                | 0              | -0.959243               | -0.004337 | 6.344176  |
| 28               | 1                | 0              | 1.647872                | -0.014542 | 5.943347  |
| 29               | 1                | 0              | 2.223841                | -0.014652 | 3.385127  |
| 30               | 1                | 0              | 5.099870                | -0.430279 | 0.893973  |
| 31               | 1                | 0              | 5.039684                | 1.112369  | 0.000000  |
| 32               | 1                | 0              | 5.099870                | -0.430279 | -0.893973 |

**Th<sub>2</sub>-BBT** GS geometry (restricted)

| Center<br>Number | Atomic<br>Number | Atomic<br>Type | Coordinates (Angstroms) |           |          |
|------------------|------------------|----------------|-------------------------|-----------|----------|
|                  |                  |                | X                       | Y         | Z        |
| 1                | 6                | 0              | -0.018671               | 1.388207  | 0.000000 |
| 2                | 6                | 0              | 1.287141                | 0.822668  | 0.000000 |
| 3                | 6                | 0              | 1.265484                | -0.602869 | 0.000000 |
| 4                | 6                | 0              | 0.018671                | -1.388207 | 0.000000 |
| 5                | 6                | 0              | -1.287141               | -0.822668 | 0.000000 |
| 6                | 6                | 0              | -1.265484               | 0.602869  | 0.000000 |
| 7                | 6                | 0              | 2.503425                | 1.608492  | 0.000000 |
| 8                | 6                | 0              | -2.503425               | -1.608492 | 0.000000 |
| 9                | 6                | 0              | -3.816136               | -1.147635 | 0.000000 |
| 10               | 6                | 0              | -4.787067               | -2.176145 | 0.000000 |
| 11               | 6                | 0              | -4.229701               | -3.428825 | 0.000000 |
| 12               | 6                | 0              | 3.816136                | 1.147635  | 0.000000 |
| 13               | 6                | 0              | 4.787067                | 2.176145  | 0.000000 |
| 14               | 6                | 0              | 4.229701                | 3.428825  | 0.000000 |
| 15               | 16               | 0              | -2.503425               | -3.378896 | 0.000000 |
| 16               | 16               | 0              | 2.503425                | 3.378896  | 0.000000 |
| 17               | 16               | 0              | 1.856624                | -2.935224 | 0.000000 |
| 18               | 16               | 0              | -1.856624               | 2.935224  | 0.000000 |
| 19               | 7                | 0              | 2.361640                | -1.389044 | 0.000000 |
| 20               | 7                | 0              | 0.245885                | -2.715631 | 0.000000 |
| 21               | 7                | 0              | -0.245885               | 2.715631  | 0.000000 |
| 22               | 7                | 0              | -2.361640               | 1.389044  | 0.000000 |
| 23               | 1                | 0              | 4.052023                | 0.094142  | 0.000000 |
| 24               | 1                | 0              | 5.855247                | 1.992708  | 0.000000 |
| 25               | 1                | 0              | 4.736828                | 4.384366  | 0.000000 |
| 26               | 1                | 0              | -4.052023               | -0.094142 | 0.000000 |
| 27               | 1                | 0              | -5.855247               | -1.992708 | 0.000000 |
| 28               | 1                | 0              | -4.736828               | -4.384366 | 0.000000 |

**Th<sub>2</sub>-BBT** GS geometry (unrestricted)

| Center<br>Number | Atomic<br>Number | Atomic<br>Type | Coordinates (Angstroms) |           |          |
|------------------|------------------|----------------|-------------------------|-----------|----------|
|                  |                  |                | X                       | Y         | Z        |
| 1                | 6                | 0              | -0.021356               | 1.390998  | 0.000000 |
| 2                | 6                | 0              | 1.286983                | 0.822674  | 0.000000 |
| 3                | 6                | 0              | 1.267356                | -0.606535 | 0.000000 |
| 4                | 6                | 0              | 0.021356                | -1.390998 | 0.000000 |
| 5                | 6                | 0              | -1.286983               | -0.822674 | 0.000000 |
| 6                | 6                | 0              | -1.267356               | 0.606535  | 0.000000 |
| 7                | 6                | 0              | 2.499932                | 1.607690  | 0.000000 |
| 8                | 6                | 0              | -2.499932               | -1.607690 | 0.000000 |
| 9                | 6                | 0              | -3.814560               | -1.146571 | 0.000000 |
| 10               | 6                | 0              | -4.784527               | -2.174565 | 0.000000 |
| 11               | 6                | 0              | -4.226550               | -3.427705 | 0.000000 |
| 12               | 6                | 0              | 3.814560                | 1.146571  | 0.000000 |
| 13               | 6                | 0              | 4.784527                | 2.174565  | 0.000000 |
| 14               | 6                | 0              | 4.226550                | 3.427705  | 0.000000 |
| 15               | 16               | 0              | -2.499932               | -3.378842 | 0.000000 |
| 16               | 16               | 0              | 2.499932                | 3.378842  | 0.000000 |
| 17               | 16               | 0              | 1.860290                | -2.941719 | 0.000000 |
| 18               | 16               | 0              | -1.860290               | 2.941719  | 0.000000 |
| 19               | 7                | 0              | 2.362205                | -1.388937 | 0.000000 |
| 20               | 7                | 0              | 0.245010                | -2.715791 | 0.000000 |
| 21               | 7                | 0              | -0.245010               | 2.715791  | 0.000000 |
| 22               | 7                | 0              | -2.362205               | 1.388937  | 0.000000 |
| 23               | 1                | 0              | 4.049594                | 0.092884  | 0.000000 |
| 24               | 1                | 0              | 5.852766                | 1.991588  | 0.000000 |
| 25               | 1                | 0              | 4.734142                | 4.383043  | 0.000000 |
| 26               | 1                | 0              | -4.049594               | -0.092884 | 0.000000 |
| 27               | 1                | 0              | -5.852766               | -1.991588 | 0.000000 |
| 28               | 1                | 0              | -4.734142               | -4.383043 | 0.000000 |



**Th<sub>2</sub>-BBT SES geometry (restricted)**

| Center<br>Number | Atomic<br>Number | Atomic<br>Type | Coordinates (Angstroms) |           |          |
|------------------|------------------|----------------|-------------------------|-----------|----------|
|                  |                  |                | X                       | Y         | Z        |
| 1                | 6                | 0              | -0.034283               | 1.403695  | 0.000000 |
| 2                | 6                | 0              | 1.271668                | 0.804649  | 0.000000 |
| 3                | 6                | 0              | 1.271668                | -0.635819 | 0.000000 |
| 4                | 6                | 0              | 0.034283                | -1.403695 | 0.000000 |
| 5                | 6                | 0              | -1.271668               | -0.804649 | 0.000000 |
| 6                | 6                | 0              | -1.271668               | 0.635819  | 0.000000 |
| 7                | 6                | 0              | 2.470393                | 1.579687  | 0.000000 |
| 8                | 6                | 0              | -2.470393               | -1.579687 | 0.000000 |
| 9                | 6                | 0              | -3.793914               | -1.108920 | 0.000000 |
| 10               | 6                | 0              | -4.759030               | -2.128694 | 0.000000 |
| 11               | 6                | 0              | -4.197153               | -3.388946 | 0.000000 |
| 12               | 6                | 0              | 3.793914                | 1.108920  | 0.000000 |
| 13               | 6                | 0              | 4.759030                | 2.128694  | 0.000000 |
| 14               | 6                | 0              | 4.197153                | 3.388946  | 0.000000 |
| 15               | 16               | 0              | -2.476727               | -3.358578 | 0.000000 |
| 16               | 16               | 0              | 2.476727                | 3.358578  | 0.000000 |
| 17               | 16               | 0              | 1.865524                | -2.986749 | 0.000000 |
| 18               | 16               | 0              | -1.865524               | 2.986749  | 0.000000 |
| 19               | 7                | 0              | 2.368784                | -1.399521 | 0.000000 |
| 20               | 7                | 0              | 0.221649                | -2.724732 | 0.000000 |
| 21               | 7                | 0              | -0.221649               | 2.724732  | 0.000000 |
| 22               | 7                | 0              | -2.368784               | 1.399521  | 0.000000 |
| 23               | 1                | 0              | 4.012126                | 0.051285  | 0.000000 |
| 24               | 1                | 0              | 5.827494                | 1.948040  | 0.000000 |
| 25               | 1                | 0              | 4.714963                | 4.339488  | 0.000000 |
| 26               | 1                | 0              | -4.012126               | -0.051285 | 0.000000 |
| 27               | 1                | 0              | -5.827494               | -1.948040 | 0.000000 |
| 28               | 1                | 0              | -4.714963               | -4.339488 | 0.000000 |

**Th<sub>2</sub>-BBT SES geometry (unrestricted)**

| Center<br>Number | Atomic<br>Number | Atomic<br>Type | Coordinates (Angstroms) |           |          |
|------------------|------------------|----------------|-------------------------|-----------|----------|
|                  |                  |                | X                       | Y         | Z        |
| 1                | 6                | 0              | -0.039788               | 1.408779  | 0.000000 |
| 2                | 6                | 0              | 1.281276                | 0.820409  | 0.000000 |
| 3                | 6                | 0              | 1.279236                | -0.630195 | 0.000000 |
| 4                | 6                | 0              | 0.039788                | -1.408779 | 0.000000 |
| 5                | 6                | 0              | -1.281276               | -0.820409 | 0.000000 |
| 6                | 6                | 0              | -1.279236               | 0.630195  | 0.000000 |
| 7                | 6                | 0              | 2.474030                | 1.600656  | 0.000000 |
| 8                | 6                | 0              | -2.474030               | -1.600656 | 0.000000 |
| 9                | 6                | 0              | -3.800771               | -1.136764 | 0.000000 |
| 10               | 6                | 0              | -4.764380               | -2.161440 | 0.000000 |
| 11               | 6                | 0              | -4.202133               | -3.417656 | 0.000000 |
| 12               | 6                | 0              | 3.800771                | 1.136764  | 0.000000 |
| 13               | 6                | 0              | 4.764380                | 2.161440  | 0.000000 |
| 14               | 6                | 0              | 4.202133                | 3.417656  | 0.000000 |
| 15               | 16               | 0              | -2.474030               | -3.376808 | 0.000000 |
| 16               | 16               | 0              | 2.474030                | 3.376808  | 0.000000 |
| 17               | 16               | 0              | 1.884097                | -2.981323 | 0.000000 |
| 18               | 16               | 0              | -1.884097               | 2.981323  | 0.000000 |
| 19               | 7                | 0              | 2.368747                | -1.389139 | 0.000000 |
| 20               | 7                | 0              | 0.241145                | -2.719510 | 0.000000 |
| 21               | 7                | 0              | -0.241145               | 2.719510  | 0.000000 |
| 22               | 7                | 0              | -2.368747               | 1.389139  | 0.000000 |
| 23               | 1                | 0              | 4.029480                | 0.081654  | 0.000000 |
| 24               | 1                | 0              | 5.833025                | 1.981623  | 0.000000 |
| 25               | 1                | 0              | 4.713294                | 4.371391  | 0.000000 |
| 26               | 1                | 0              | -4.029480               | -0.081654 | 0.000000 |
| 27               | 1                | 0              | -5.833025               | -1.981623 | 0.000000 |
| 28               | 1                | 0              | -4.713294               | -4.371391 | 0.000000 |

**Th<sub>2</sub>-BBT** TES geometry (unrestricted)

| Center<br>Number | Atomic<br>Number | Atomic<br>Type | Coordinates (Angstroms) |           |          |
|------------------|------------------|----------------|-------------------------|-----------|----------|
|                  |                  |                | X                       | Y         | Z        |
| 1                | 6                | 0              | -0.022079               | 1.402755  | 0.000000 |
| 2                | 6                | 0              | 1.276732                | 0.802643  | 0.000000 |
| 3                | 6                | 0              | 1.275413                | -0.624812 | 0.000000 |
| 4                | 6                | 0              | 0.022079                | -1.402755 | 0.000000 |
| 5                | 6                | 0              | -1.276732               | -0.802643 | 0.000000 |
| 6                | 6                | 0              | -1.275413               | 0.624812  | 0.000000 |
| 7                | 6                | 0              | 2.491901                | 1.584228  | 0.000000 |
| 8                | 6                | 0              | -2.491901               | -1.584228 | 0.000000 |
| 9                | 6                | 0              | -3.828489               | -1.102901 | 0.000000 |
| 10               | 6                | 0              | -4.800396               | -2.121341 | 0.000000 |
| 11               | 6                | 0              | -4.254603               | -3.380169 | 0.000000 |
| 12               | 6                | 0              | 3.828489                | 1.102901  | 0.000000 |
| 13               | 6                | 0              | 4.800396                | 2.121341  | 0.000000 |
| 14               | 6                | 0              | 4.254603                | 3.380169  | 0.000000 |
| 15               | 16               | 0              | -2.491901               | -3.333410 | 0.000000 |
| 16               | 16               | 0              | 2.491901                | 3.333410  | 0.000000 |
| 17               | 16               | 0              | 1.862131                | -2.978262 | 0.000000 |
| 18               | 16               | 0              | -1.862131               | 2.978262  | 0.000000 |
| 19               | 7                | 0              | 2.368173                | -1.402926 | 0.000000 |
| 20               | 7                | 0              | 0.220121                | -2.718967 | 0.000000 |
| 21               | 7                | 0              | -0.220121               | 2.718967  | 0.000000 |
| 22               | 7                | 0              | -2.368173               | 1.402926  | 0.000000 |
| 23               | 1                | 0              | 4.037864                | 0.043546  | 0.000000 |
| 24               | 1                | 0              | 5.867291                | 1.930392  | 0.000000 |
| 25               | 1                | 0              | 4.761175                | 4.335846  | 0.000000 |
| 26               | 1                | 0              | -4.037864               | -0.043546 | 0.000000 |
| 27               | 1                | 0              | -5.867291               | -1.930392 | 0.000000 |
| 28               | 1                | 0              | -4.761175               | -4.335846 | 0.000000 |

**Th<sub>2</sub>-BTa** GS geometry (restricted)

| Center<br>Number | Atomic<br>Number | Atomic<br>Type | Coordinates (Angstroms) |           |           |
|------------------|------------------|----------------|-------------------------|-----------|-----------|
|                  |                  |                | X                       | Y         | Z         |
| 1                | 6                | 0              | -0.714135               | 0.790590  | -0.002930 |
| 2                | 6                | 0              | -1.478642               | -0.417811 | 0.002146  |
| 3                | 6                | 0              | -0.705607               | -1.575136 | 0.010049  |
| 4                | 6                | 0              | 0.705607                | -1.575136 | 0.010047  |
| 5                | 6                | 0              | 1.478643                | -0.417811 | 0.002142  |
| 6                | 6                | 0              | 0.714135                | 0.790590  | -0.002932 |
| 7                | 7                | 0              | 1.132841                | 2.076165  | -0.014916 |
| 8                | 7                | 0              | -1.132842               | 2.076165  | -0.014912 |
| 9                | 7                | 0              | -0.000001               | 2.764746  | -0.026137 |
| 10               | 6                | 0              | -2.935833               | -0.428546 | 0.000999  |
| 11               | 6                | 0              | -3.811683               | 0.638276  | 0.001570  |
| 12               | 16               | 0              | -3.837583               | -1.941772 | -0.001379 |
| 13               | 6                | 0              | -5.181188               | 0.252672  | 0.000488  |
| 14               | 1                | 0              | -3.467054               | 1.663379  | 0.002682  |
| 15               | 6                | 0              | -5.354379               | -1.103920 | -0.001049 |
| 16               | 1                | 0              | -6.004193               | 0.958166  | 0.000886  |
| 17               | 1                | 0              | -6.278108               | -1.665470 | -0.002231 |
| 18               | 6                | 0              | 2.935833                | -0.428545 | 0.000993  |
| 19               | 6                | 0              | 3.811683                | 0.638276  | 0.001524  |
| 20               | 16               | 0              | 3.837584                | -1.941772 | -0.001335 |
| 21               | 6                | 0              | 5.181188                | 0.252672  | 0.000449  |
| 22               | 1                | 0              | 3.467054                | 1.663380  | 0.002603  |
| 23               | 6                | 0              | 5.354379                | -1.103919 | -0.001040 |
| 24               | 1                | 0              | 6.004193                | 0.958166  | 0.000818  |
| 25               | 1                | 0              | 6.278108                | -1.665469 | -0.002206 |
| 26               | 6                | 0              | -0.000001               | 4.217122  | 0.025755  |
| 27               | 1                | 0              | -0.896357               | 4.576650  | -0.477971 |
| 28               | 1                | 0              | 0.896351                | 4.576650  | -0.477979 |
| 29               | 1                | 0              | 0.000004                | 4.557732  | 1.065043  |
| 30               | 1                | 0              | -1.201328               | -2.541125 | 0.017144  |
| 31               | 1                | 0              | 1.201329                | -2.541124 | 0.017139  |

**Th<sub>2</sub>-BTa SES geometry (restricted)**

| Center<br>Number | Atomic<br>Number | Atomic<br>Type | Coordinates (Angstroms) |           |           |
|------------------|------------------|----------------|-------------------------|-----------|-----------|
|                  |                  |                | X                       | Y         | Z         |
| 1                | 6                | 0              | -0.713181               | 0.807974  | -0.026299 |
| 2                | 6                | 0              | -1.460478               | -0.413386 | -0.005883 |
| 3                | 6                | 0              | -0.689022               | -1.619295 | 0.017128  |
| 4                | 6                | 0              | 0.689022                | -1.619295 | 0.017128  |
| 5                | 6                | 0              | 1.460478                | -0.413386 | -0.005882 |
| 6                | 6                | 0              | 0.713181                | 0.807974  | -0.026300 |
| 7                | 7                | 0              | 1.154609                | 2.079194  | -0.051693 |
| 8                | 7                | 0              | -1.154609               | 2.079194  | -0.051694 |
| 9                | 7                | 0              | 0.000000                | 2.800311  | -0.117557 |
| 10               | 6                | 0              | -2.888027               | -0.429132 | -0.006852 |
| 11               | 6                | 0              | -3.776785               | 0.652578  | -0.031662 |
| 12               | 16               | 0              | -3.802298               | -1.952223 | 0.026269  |
| 13               | 6                | 0              | -5.131067               | 0.264906  | -0.023560 |
| 14               | 1                | 0              | -3.415455               | 1.671827  | -0.056133 |
| 15               | 6                | 0              | -5.306949               | -1.102958 | 0.006987  |
| 16               | 1                | 0              | -5.958839               | 0.964651  | -0.039995 |
| 17               | 1                | 0              | -6.237078               | -1.654568 | 0.018835  |
| 18               | 6                | 0              | 2.888027                | -0.429132 | -0.006852 |
| 19               | 6                | 0              | 3.776785                | 0.652578  | -0.031661 |
| 20               | 16               | 0              | 3.802298                | -1.952223 | 0.026270  |
| 21               | 6                | 0              | 5.131067                | 0.264906  | -0.023560 |
| 22               | 1                | 0              | 3.415454                | 1.671827  | -0.056131 |
| 23               | 6                | 0              | 5.306950                | -1.102958 | 0.006985  |
| 24               | 1                | 0              | 5.958839                | 0.964651  | -0.039996 |
| 25               | 1                | 0              | 6.237078                | -1.654567 | 0.018832  |
| 26               | 6                | 0              | 0.000000                | 4.214544  | 0.160378  |
| 27               | 1                | 0              | -0.894013               | 4.654095  | -0.284381 |
| 28               | 1                | 0              | 0.894012                | 4.654095  | -0.284383 |
| 29               | 1                | 0              | 0.000000                | 4.417469  | 1.240974  |
| 30               | 1                | 0              | -1.207889               | -2.572378 | 0.033901  |
| 31               | 1                | 0              | 1.207890                | -2.572378 | 0.033901  |

**Th<sub>2</sub>-BT** GS geometry (restricted)

| Center<br>Number | Atomic<br>Number | Atomic<br>Type | Coordinates (Angstroms) |           |           |
|------------------|------------------|----------------|-------------------------|-----------|-----------|
|                  |                  |                | X                       | Y         | Z         |
| 1                | 16               | 0              | 0.000002                | 3.195477  | -0.000007 |
| 2                | 6                | 0              | 1.482297                | -0.326198 | 0.000004  |
| 3                | 6                | 0              | 0.730539                | 0.905635  | 0.000000  |
| 4                | 6                | 0              | -1.482297               | -0.326197 | 0.000002  |
| 5                | 6                | 0              | -0.730539               | 0.905637  | -0.000001 |
| 6                | 6                | 0              | 0.706704                | -1.474806 | 0.000007  |
| 7                | 1                | 0              | 1.197515                | -2.443126 | 0.000011  |
| 8                | 6                | 0              | -0.706705               | -1.474805 | 0.000006  |
| 9                | 1                | 0              | -1.197516               | -2.443125 | 0.000010  |
| 10               | 7                | 0              | 1.252927                | 2.135725  | -0.000003 |
| 11               | 7                | 0              | -1.252927               | 2.135726  | -0.000005 |
| 12               | 6                | 0              | -2.940081               | -0.361532 | 0.000001  |
| 13               | 6                | 0              | -3.848461               | 0.678653  | -0.000009 |
| 14               | 16               | 0              | -3.800361               | -1.901492 | 0.000006  |
| 15               | 6                | 0              | -5.205540               | 0.253046  | -0.000006 |
| 16               | 1                | 0              | -3.536512               | 1.713219  | -0.000014 |
| 17               | 6                | 0              | -5.339310               | -1.107938 | 0.000009  |
| 18               | 1                | 0              | -6.048109               | 0.934859  | -0.000010 |
| 19               | 1                | 0              | -6.246352               | -1.696147 | 0.000012  |
| 20               | 6                | 0              | 2.940081                | -0.361533 | 0.000004  |
| 21               | 6                | 0              | 3.848460                | 0.678653  | 0.000025  |
| 22               | 16               | 0              | 3.800360                | -1.901493 | -0.000025 |
| 23               | 6                | 0              | 5.205539                | 0.253046  | 0.000024  |
| 24               | 1                | 0              | 3.536512                | 1.713218  | 0.000041  |
| 25               | 6                | 0              | 5.339310                | -1.107938 | -0.000002 |
| 26               | 1                | 0              | 6.048108                | 0.934859  | 0.000040  |
| 27               | 1                | 0              | 6.246351                | -1.696147 | -0.000005 |

**Th<sub>2</sub>-BT SES geometry (restricted)**

| Center<br>Number | Atomic<br>Number | Atomic<br>Type | Coordinates (Angstroms) |           |           |
|------------------|------------------|----------------|-------------------------|-----------|-----------|
|                  |                  |                | X                       | Y         | Z         |
| 1                | 16               | 0              | 0.000000                | 3.233125  | 0.000000  |
| 2                | 6                | 0              | 1.445030                | -0.329153 | 0.000002  |
| 3                | 6                | 0              | 0.714043                | 0.914502  | 0.000000  |
| 4                | 6                | 0              | -1.445030               | -0.329153 | -0.000001 |
| 5                | 6                | 0              | -0.714043               | 0.914503  | -0.000001 |
| 6                | 6                | 0              | 0.689335                | -1.532347 | 0.000002  |
| 7                | 1                | 0              | 1.207505                | -2.485600 | 0.000003  |
| 8                | 6                | 0              | -0.689335               | -1.532347 | 0.000000  |
| 9                | 1                | 0              | -1.207506               | -2.485600 | 0.000000  |
| 10               | 7                | 0              | 1.286405                | 2.140210  | 0.000002  |
| 11               | 7                | 0              | -1.286405               | 2.140210  | -0.000002 |
| 12               | 6                | 0              | -2.877517               | -0.370741 | -0.000003 |
| 13               | 6                | 0              | -3.790674               | 0.688763  | -0.000005 |
| 14               | 16               | 0              | -3.758925               | -1.913766 | -0.000004 |
| 15               | 6                | 0              | -5.136075               | 0.272442  | -0.000007 |
| 16               | 1                | 0              | -3.443346               | 1.712774  | -0.000004 |
| 17               | 6                | 0              | -5.277652               | -1.099256 | -0.000007 |
| 18               | 1                | 0              | -5.978897               | 0.953498  | -0.000008 |
| 19               | 1                | 0              | -6.195155               | -1.672148 | -0.000009 |
| 20               | 6                | 0              | 2.877517                | -0.370741 | 0.000004  |
| 21               | 6                | 0              | 3.790674                | 0.688763  | 0.000005  |
| 22               | 16               | 0              | 3.758925                | -1.913766 | 0.000003  |
| 23               | 6                | 0              | 5.136075                | 0.272442  | 0.000007  |
| 24               | 1                | 0              | 3.443346                | 1.712773  | 0.000005  |
| 25               | 6                | 0              | 5.277652                | -1.099256 | 0.000007  |
| 26               | 1                | 0              | 5.978897                | 0.953498  | 0.000009  |
| 27               | 1                | 0              | 6.195155                | -1.672148 | 0.000008  |

**Th<sub>2</sub>-ST GS geometry (restricted)**

| Center<br>Number | Atomic<br>Number | Atomic<br>Type | Coordinates (Angstroms) |           |           |
|------------------|------------------|----------------|-------------------------|-----------|-----------|
|                  |                  |                | X                       | Y         | Z         |
| 1                | 6                | 0              | 1.482297                | -0.326198 | 0.000004  |
| 2                | 6                | 0              | 0.730539                | 0.905635  | 0.000000  |
| 3                | 6                | 0              | -1.482297               | -0.326197 | 0.000002  |
| 4                | 6                | 0              | -0.730539               | 0.905637  | -0.000001 |
| 5                | 6                | 0              | 0.706704                | -1.474806 | 0.000007  |
| 6                | 1                | 0              | 1.197515                | -2.443126 | 0.000011  |
| 7                | 6                | 0              | -0.706705               | -1.474805 | 0.000006  |
| 8                | 1                | 0              | -1.197516               | -2.443125 | 0.000010  |
| 9                | 7                | 0              | 1.252927                | 2.135725  | -0.000003 |
| 10               | 7                | 0              | -1.252927               | 2.135726  | -0.000005 |
| 11               | 6                | 0              | -2.940081               | -0.361532 | 0.000001  |
| 12               | 6                | 0              | -3.848461               | 0.678653  | -0.000009 |
| 13               | 16               | 0              | -3.800361               | -1.901492 | 0.000006  |
| 14               | 6                | 0              | -5.20554                | 0.253046  | -0.000006 |
| 15               | 1                | 0              | -3.536512               | 1.713219  | -0.000014 |
| 16               | 6                | 0              | -5.33931                | -1.107938 | 0.000009  |
| 17               | 1                | 0              | -6.048109               | 0.934859  | -0.00001  |
| 18               | 1                | 0              | -6.246352               | -1.696147 | 0.000012  |
| 19               | 6                | 0              | 2.940081                | -0.361533 | 0.000004  |
| 20               | 6                | 0              | 3.84846                 | 0.678653  | 0.000025  |
| 21               | 16               | 0              | 3.80036                 | -1.901493 | -0.000025 |
| 22               | 6                | 0              | 5.205539                | 0.253046  | 0.000024  |
| 23               | 1                | 0              | 3.536512                | 1.713218  | 0.000041  |
| 24               | 6                | 0              | 5.33931                 | -1.107938 | -0.000002 |
| 25               | 1                | 0              | 6.048108                | 0.934859  | 0.00004   |
| 26               | 1                | 0              | 6.246351                | -1.696147 | -0.000005 |
| 27               | 34               | 0              | 0.000002                | 3.195477  | -0.000007 |



**Th<sub>2</sub>-ST SES geometry (restricted)**

| Center<br>Number | Atomic<br>Number | Atomic<br>Type | Coordinates (Angstroms) |           |           |
|------------------|------------------|----------------|-------------------------|-----------|-----------|
|                  |                  |                | X                       | Y         | Z         |
| 1                | 6                | 0              | 1.442128                | -0.677422 | 0.000003  |
| 2                | 6                | 0              | 0.717856                | 0.576435  | 0.000000  |
| 3                | 6                | 0              | -1.442129               | -0.677422 | -0.000001 |
| 4                | 6                | 0              | -0.717856               | 0.576436  | -0.000001 |
| 5                | 6                | 0              | 0.688824                | -1.880087 | 0.000002  |
| 6                | 1                | 0              | 1.206649                | -2.833462 | 0.000004  |
| 7                | 6                | 0              | -0.688824               | -1.880087 | 0.000000  |
| 8                | 1                | 0              | -1.206650               | -2.833462 | 0.000000  |
| 9                | 7                | 0              | 1.342592                | 1.772167  | 0.000002  |
| 10               | 7                | 0              | -1.342592               | 1.772167  | -0.000003 |
| 11               | 6                | 0              | -2.875113               | -0.732206 | -0.000003 |
| 12               | 6                | 0              | -3.802563               | 0.314572  | -0.000003 |
| 13               | 16               | 0              | -3.739431               | -2.286296 | -0.000001 |
| 14               | 6                | 0              | -5.142834               | -0.117904 | -0.000007 |
| 15               | 1                | 0              | -3.464646               | 1.341334  | -0.000002 |
| 16               | 6                | 0              | -5.267620               | -1.490936 | -0.000010 |
| 17               | 1                | 0              | -5.993716               | 0.553064  | -0.000009 |
| 18               | 1                | 0              | -6.177905               | -2.075271 | -0.000013 |
| 19               | 6                | 0              | 2.875113                | -0.732205 | 0.000004  |
| 20               | 6                | 0              | 3.802563                | 0.314573  | 0.000007  |
| 21               | 16               | 0              | 3.739431                | -2.286296 | 0.000004  |
| 22               | 6                | 0              | 5.142833                | -0.117904 | 0.000007  |
| 23               | 1                | 0              | 3.464646                | 1.341335  | 0.000007  |
| 24               | 6                | 0              | 5.267620                | -1.490935 | 0.000005  |
| 25               | 1                | 0              | 5.993716                | 0.553064  | 0.000009  |
| 26               | 1                | 0              | 6.177904                | -2.075270 | 0.000005  |
| 27               | 34               | 0              | 0.000000                | 3.013834  | -0.000001 |

**Sh<sub>2</sub>-BT** GS geometry (restricted)

| Center<br>Number | Atomic<br>Number | Atomic<br>Type | Coordinates (Angstroms) |           |           |
|------------------|------------------|----------------|-------------------------|-----------|-----------|
|                  |                  |                | X                       | Y         | Z         |
| 1                | 6                | 0              | -1.483636               | -0.864299 | 0.000000  |
| 2                | 6                | 0              | -0.726985               | 0.357989  | 0.000000  |
| 3                | 6                | 0              | 1.483636                | -0.864299 | 0.000000  |
| 4                | 6                | 0              | 0.726985                | 0.357989  | 0.000001  |
| 5                | 6                | 0              | -0.706658               | -2.015441 | 0.000000  |
| 6                | 1                | 0              | -1.196811               | -2.982701 | -0.000001 |
| 7                | 6                | 0              | 0.706658                | -2.015441 | 0.000000  |
| 8                | 1                | 0              | 1.196811                | -2.982701 | -0.000001 |
| 9                | 7                | 0              | -1.251860               | 1.585985  | 0.000001  |
| 10               | 7                | 0              | 1.251860                | 1.585985  | 0.000000  |
| 11               | 6                | 0              | 2.938917                | -0.893257 | 0.000000  |
| 12               | 6                | 0              | 3.742421                | -2.015572 | 0.000001  |
| 13               | 6                | 0              | 5.144321                | -1.784146 | 0.000001  |
| 14               | 1                | 0              | 3.333736                | -3.020147 | 0.000003  |
| 15               | 6                | 0              | 5.502893                | -0.465070 | 0.000000  |
| 16               | 1                | 0              | 5.866337                | -2.594046 | 0.000002  |
| 17               | 1                | 0              | 6.507495                | -0.065025 | -0.000001 |
| 18               | 6                | 0              | -2.938917               | -0.893257 | 0.000000  |
| 19               | 6                | 0              | -3.742421               | -2.015572 | 0.000000  |
| 20               | 6                | 0              | -5.144321               | -1.784146 | 0.000000  |
| 21               | 1                | 0              | -3.333736               | -3.020147 | 0.000000  |
| 22               | 6                | 0              | -5.502893               | -0.465070 | 0.000000  |
| 23               | 1                | 0              | -5.866337               | -2.594046 | 0.000000  |
| 24               | 1                | 0              | -6.507496               | -0.065025 | 0.000000  |
| 25               | 16               | 0              | 0.000000                | 2.649883  | 0.000001  |
| 26               | 34               | 0              | 4.018227                | 0.659992  | -0.000001 |
| 27               | 34               | 0              | -4.018227               | 0.659992  | 0.000000  |

**Sh<sub>2</sub>-BT** SES geometry (restricted)

| Center<br>Number | Atomic<br>Number | Atomic<br>Type | Coordinates (Angstroms) |           |           |
|------------------|------------------|----------------|-------------------------|-----------|-----------|
|                  |                  |                | X                       | Y         | Z         |
| 1                | 6                | 0              | 0.000000                | 1.446347  | -0.895636 |
| 2                | 6                | 0              | 0.000000                | 0.708481  | 0.335376  |
| 3                | 6                | 0              | 0.000000                | -1.446347 | -0.895636 |
| 4                | 6                | 0              | 0.000000                | -0.708481 | 0.335376  |
| 5                | 6                | 0              | 0.000000                | 0.690789  | -2.100660 |
| 6                | 1                | 0              | 0.000000                | 1.208426  | -3.052611 |
| 7                | 6                | 0              | 0.000000                | -0.690789 | -2.100660 |
| 8                | 1                | 0              | 0.000000                | -1.208426 | -3.052611 |
| 9                | 7                | 0              | 0.000000                | 1.285304  | 1.556782  |
| 10               | 7                | 0              | 0.000000                | -1.285304 | 1.556782  |
| 11               | 6                | 0              | 0.000000                | -2.874387 | -0.910911 |
| 12               | 6                | 0              | 0.000000                | -3.713858 | -2.029676 |
| 13               | 6                | 0              | 0.000000                | -5.093049 | -1.761597 |
| 14               | 1                | 0              | 0.000000                | -3.324281 | -3.040986 |
| 15               | 6                | 0              | 0.000000                | -5.412739 | -0.417253 |
| 16               | 1                | 0              | 0.000000                | -5.841224 | -2.547170 |
| 17               | 1                | 0              | 0.000000                | -6.414344 | -0.007271 |
| 18               | 6                | 0              | 0.000000                | 2.874387  | -0.910911 |
| 19               | 6                | 0              | 0.000000                | 3.713858  | -2.029676 |
| 20               | 6                | 0              | 0.000000                | 5.093049  | -1.761597 |
| 21               | 1                | 0              | 0.000000                | 3.324281  | -3.040986 |
| 22               | 6                | 0              | 0.000000                | 5.412739  | -0.417253 |
| 23               | 1                | 0              | 0.000000                | 5.841224  | -2.547170 |
| 24               | 1                | 0              | 0.000000                | 6.414344  | -0.007271 |
| 25               | 16               | 0              | 0.000000                | 0.000000  | 2.657499  |
| 26               | 34               | 0              | 0.000000                | -3.918156 | 0.681550  |
| 27               | 34               | 0              | 0.000000                | 3.918156  | 0.681550  |

**Sh<sub>2</sub>-ST** GS geometry (restricted)

| Center<br>Number | Atomic<br>Number | Atomic<br>Type | Coordinates (Angstroms) |           |           |
|------------------|------------------|----------------|-------------------------|-----------|-----------|
|                  |                  |                | X                       | Y         | Z         |
| 1                | 6                | 0              | 0.000000                | 1.481673  | -1.114411 |
| 2                | 6                | 0              | 0.000000                | 0.733531  | 0.120799  |
| 3                | 6                | 0              | 0.000000                | -1.481673 | -1.114411 |
| 4                | 6                | 0              | 0.000000                | -0.733531 | 0.120799  |
| 5                | 6                | 0              | 0.000000                | 0.707494  | -2.263536 |
| 6                | 1                | 0              | 0.000000                | 1.197955  | -3.230684 |
| 7                | 6                | 0              | 0.000000                | -0.707494 | -2.263536 |
| 8                | 1                | 0              | 0.000000                | -1.197955 | -3.230684 |
| 9                | 7                | 0              | 0.000000                | 1.308631  | 1.314027  |
| 10               | 7                | 0              | 0.000000                | -1.308631 | 1.314027  |
| 11               | 6                | 0              | 0.000000                | -2.936759 | -1.145191 |
| 12               | 6                | 0              | 0.000000                | -3.739752 | -2.268019 |
| 13               | 6                | 0              | 0.000000                | -5.141919 | -2.037836 |
| 14               | 1                | 0              | 0.000000                | -3.330510 | -3.272407 |
| 15               | 6                | 0              | 0.000000                | -5.501334 | -0.718994 |
| 16               | 1                | 0              | 0.000000                | -5.862533 | -2.849082 |
| 17               | 1                | 0              | 0.000000                | -6.506881 | -0.321039 |
| 18               | 6                | 0              | 0.000000                | 2.936759  | -1.145191 |
| 19               | 6                | 0              | 0.000000                | 3.739752  | -2.268019 |
| 20               | 6                | 0              | 0.000000                | 5.141919  | -2.037836 |
| 21               | 1                | 0              | 0.000000                | 3.330510  | -3.272407 |
| 22               | 6                | 0              | 0.000000                | 5.501334  | -0.718994 |
| 23               | 1                | 0              | 0.000000                | 5.862533  | -2.849082 |
| 24               | 1                | 0              | 0.000000                | 6.506881  | -0.321039 |
| 25               | 34               | 0              | 0.000000                | -4.016599 | 0.408015  |
| 26               | 34               | 0              | 0.000000                | 4.016599  | 0.408015  |
| 27               | 34               | 0              | 0.000000                | 0.000000  | 2.539156  |

**Sh<sub>2</sub>-ST SES geometry (restricted)**

| Center<br>Number | Atomic<br>Number | Atomic<br>Type | Coordinates (Angstroms) |           |           |
|------------------|------------------|----------------|-------------------------|-----------|-----------|
|                  |                  |                | X                       | Y         | Z         |
| 1                | 6                | 0              | 0.000000                | 1.441921  | -1.142360 |
| 2                | 6                | 0              | 0.000000                | 0.711121  | 0.098527  |
| 3                | 6                | 0              | 0.000000                | -1.441921 | -1.142360 |
| 4                | 6                | 0              | 0.000000                | -0.711121 | 0.098527  |
| 5                | 6                | 0              | 0.000000                | 0.690766  | -2.347730 |
| 6                | 1                | 0              | 0.000000                | 1.209440  | -3.298963 |
| 7                | 6                | 0              | 0.000000                | -0.690766 | -2.347730 |
| 8                | 1                | 0              | 0.000000                | -1.209440 | -3.298963 |
| 9                | 7                | 0              | 0.000000                | 1.341004  | 1.288832  |
| 10               | 7                | 0              | 0.000000                | -1.341004 | 1.288832  |
| 11               | 6                | 0              | 0.000000                | -2.869690 | -1.160412 |
| 12               | 6                | 0              | 0.000000                | -3.706706 | -2.281381 |
| 13               | 6                | 0              | 0.000000                | -5.086638 | -2.017313 |
| 14               | 1                | 0              | 0.000000                | -3.315276 | -3.291905 |
| 15               | 6                | 0              | 0.000000                | -5.409044 | -0.673939 |
| 16               | 1                | 0              | 0.000000                | -5.831793 | -2.805817 |
| 17               | 1                | 0              | 0.000000                | -6.412202 | -0.267311 |
| 18               | 6                | 0              | 0.000000                | 2.869690  | -1.160412 |
| 19               | 6                | 0              | 0.000000                | 3.706706  | -2.281381 |
| 20               | 6                | 0              | 0.000000                | 5.086638  | -2.017313 |
| 21               | 1                | 0              | 0.000000                | 3.315276  | -3.291905 |
| 22               | 6                | 0              | 0.000000                | 5.409044  | -0.673939 |
| 23               | 1                | 0              | 0.000000                | 5.831793  | -2.805817 |
| 24               | 1                | 0              | 0.000000                | 6.412202  | -0.267311 |
| 25               | 34               | 0              | 0.000000                | -3.915507 | 0.429578  |
| 26               | 34               | 0              | 0.000000                | 3.915507  | 0.429578  |
| 27               | 34               | 0              | 0.000000                | 0.000000  | 2.540245  |

### Th<sub>2</sub>-BBTa15

| Atom | No | PEC      |
|------|----|----------|
| C    | 1  | 0.00635  |
| C    | 2  | 0.00951  |
| C    | 3  | -0.01736 |
| C    | 4  | 0.00635  |
| C    | 5  | 0.00951  |
| C    | 6  | -0.01736 |
| N    | 7  | -0.00524 |
| N    | 8  | 0.01778  |
| N    | 9  | -0.00526 |
| N    | 10 | -0.06643 |
| C    | 11 | 0.03199  |
| C    | 12 | 0.01438  |
| C    | 13 | 0.00181  |
| C    | 14 | 0.02299  |
| C    | 15 | 0.03199  |
| C    | 16 | -0.00406 |
| S    | 17 | -0.01427 |
| H    | 18 | 0.00593  |
| H    | 19 | 0.00278  |
| H    | 20 | -0.00036 |
| H    | 21 | -0.00598 |
| H    | 22 | 0.00146  |
| H    | 23 | -0.00128 |
| N    | 24 | -0.06643 |
| N    | 25 | 0.01778  |
| C    | 26 | -0.00406 |
| H    | 27 | 0.00278  |
| H    | 28 | 0.00593  |
| H    | 29 | -0.00036 |
| C    | 30 | 0.01438  |
| C    | 31 | 0.00182  |
| S    | 32 | -0.01427 |
| C    | 33 | 0.02299  |
| H    | 34 | -0.00127 |
| H    | 35 | 0.00146  |
| H    | 36 | -0.00597 |

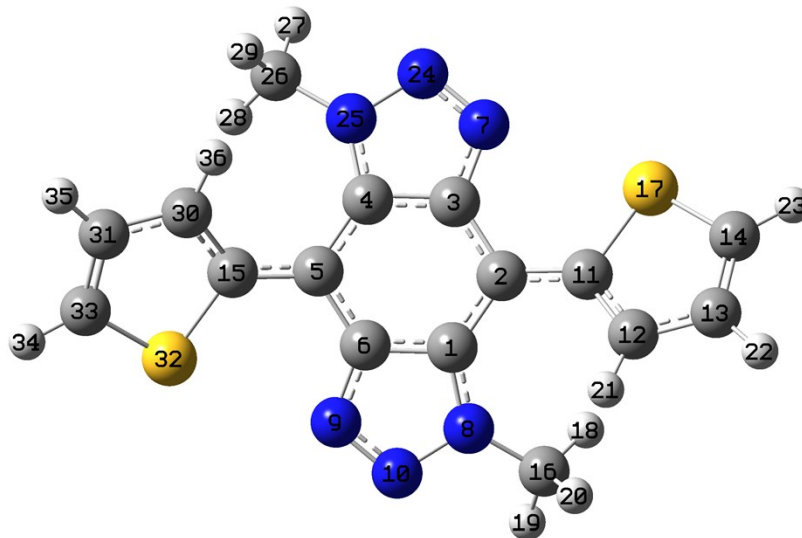

### Th<sub>2</sub>-BBTa17

| Atom | No | PEC      |
|------|----|----------|
| C    | 1  | -0.03003 |
| C    | 2  | 0.08615  |
| C    | 3  | -0.03449 |
| C    | 4  | 0.02919  |
| C    | 5  | -0.06416 |
| C    | 6  | 0.02947  |
| N    | 7  | -0.01114 |
| N    | 8  | 0.02218  |
| N    | 9  | -0.01102 |
| N    | 10 | 0.02302  |
| N    | 11 | -0.05417 |
| N    | 12 | -0.05225 |
| C    | 13 | -0.00529 |
| C    | 14 | 0.07464  |
| C    | 15 | 0.00452  |
| C    | 16 | 0.0018   |
| C    | 17 | 0.01037  |
| C    | 18 | -0.0113  |
| C    | 19 | 0.00694  |
| C    | 20 | 0.02567  |
| C    | 21 | -0.00164 |
| C    | 22 | 0.00234  |
| S    | 23 | 0.00182  |
| S    | 24 | -0.05549 |
| H    | 25 | 0.00472  |
| H    | 26 | 0.00189  |
| H    | 27 | -0.0028  |
| H    | 28 | 0.00096  |
| H    | 29 | 0.00302  |
| H    | 30 | 0.00274  |
| H    | 31 | -0.00431 |
| H    | 32 | 0.00047  |
| H    | 33 | 6E-05    |
| H    | 34 | 0.00154  |
| H    | 35 | 0.00283  |
| H    | 36 | 0.00202  |

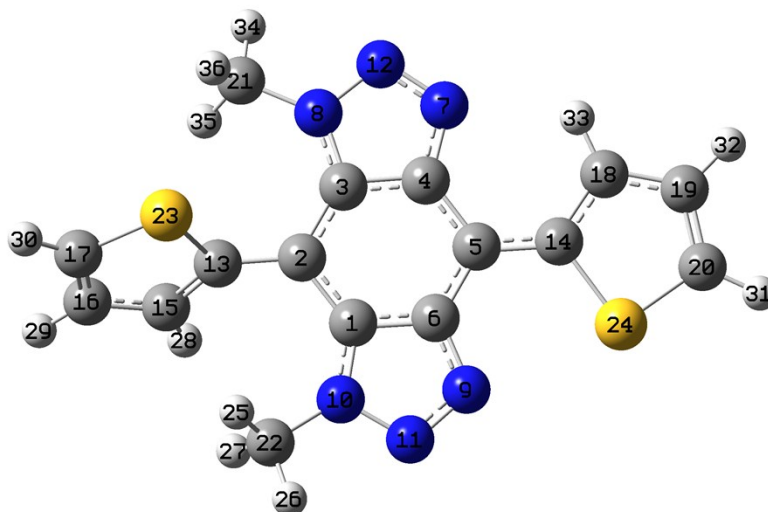

### Th<sub>2</sub>-BBTa16

| Atom | No | PEC      |
|------|----|----------|
| C    | 1  | -0.01122 |
| C    | 2  | 0.05815  |
| C    | 3  | -0.01532 |
| C    | 4  | 0.01308  |
| C    | 5  | -0.02228 |
| C    | 6  | 0.00535  |
| N    | 7  | 0.00323  |
| N    | 8  | 0.00885  |
| N    | 9  | 0.02061  |
| N    | 10 | -0.00039 |
| N    | 11 | -0.07241 |
| N    | 12 | -0.06633 |
| C    | 13 | 0.0158   |
| C    | 14 | 0.02506  |
| C    | 15 | 0.00107  |
| C    | 16 | 0.02685  |
| C    | 17 | 0.03762  |
| C    | 18 | 0.00022  |
| C    | 19 | 0.001    |
| C    | 20 | 0.01808  |
| C    | 21 | 0.00056  |
| C    | 22 | -0.00382 |
| S    | 23 | 0.00632  |
| S    | 24 | -0.03258 |
| H    | 25 | 5E-05    |
| H    | 26 | 0.00045  |
| H    | 27 | -0.00281 |
| H    | 28 | -0.00609 |
| H    | 29 | -0.00636 |
| H    | 30 | -0.0154  |
| H    | 31 | 0.00619  |
| H    | 32 | 0.00385  |
| H    | 33 | -0.00043 |
| H    | 34 | -0.00312 |
| H    | 35 | 0.00412  |
| H    | 36 | 0.00203  |

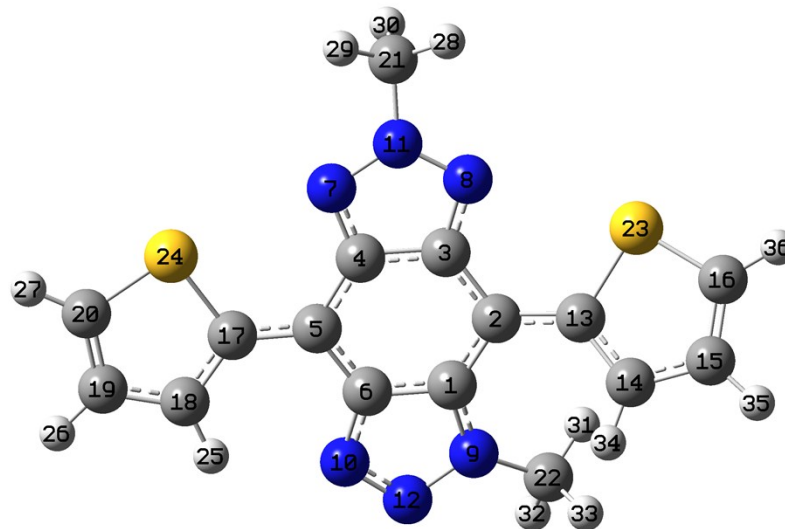



### Th<sub>2</sub>-BBTa26

| Atom | No | PEC      |
|------|----|----------|
| C    | 1  | -0.00042 |
| C    | 2  | 0.03006  |
| C    | 3  | -0.00185 |
| C    | 4  | -0.00042 |
| C    | 5  | 0.03006  |
| C    | 6  | -0.00185 |
| N    | 7  | 0.01457  |
| N    | 8  | 0.01339  |
| N    | 9  | 0.01339  |
| N    | 10 | 0.01457  |
| N    | 11 | -0.08693 |
| N    | 12 | -0.08693 |
| C    | 13 | 0.02085  |
| C    | 14 | 0.02302  |
| S    | 15 | -0.01761 |
| C    | 16 | -0.00048 |
| H    | 17 | 0.00339  |
| C    | 18 | 0.03026  |
| H    | 19 | 0.00352  |
| H    | 20 | 0.00049  |
| C    | 21 | 0.02085  |
| C    | 22 | 0.02302  |
| S    | 23 | -0.01761 |
| C    | 24 | -0.00048 |
| H    | 25 | 0.00339  |
| C    | 26 | 0.03026  |
| H    | 27 | 0.00352  |
| H    | 28 | 0.00049  |
| C    | 29 | 0.00151  |
| C    | 30 | 0.00151  |
| H    | 31 | -0.00768 |
| H    | 32 | -0.00767 |
| H    | 33 | -0.01842 |
| H    | 34 | -0.00767 |
| H    | 35 | -0.00768 |
| H    | 36 | -0.01842 |

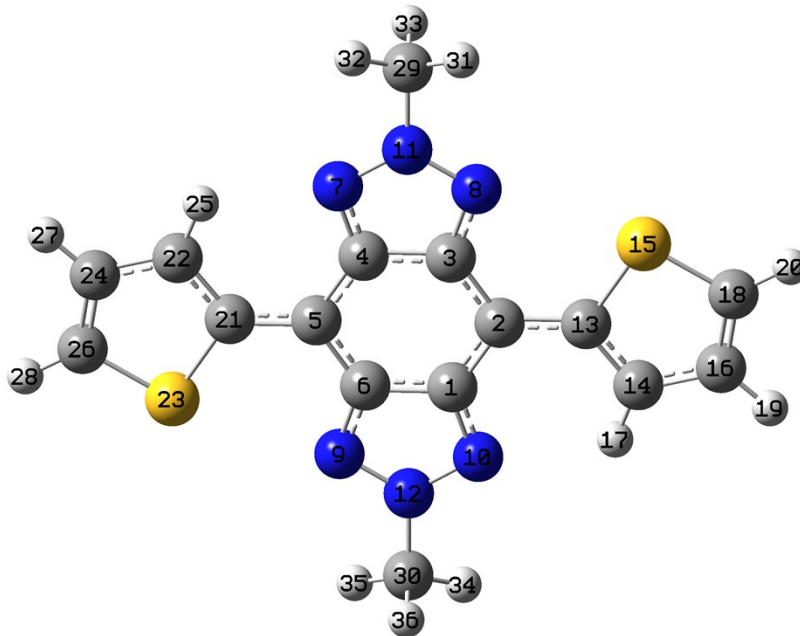

**Th<sub>2</sub>-SBTa**

| Atom | No | PEC      |
|------|----|----------|
| C    | 1  | 0.03512  |
| C    | 2  | -0.0002  |
| C    | 3  | -0.0002  |
| C    | 4  | 0.03512  |
| C    | 5  | -0.0028  |
| C    | 6  | -0.0028  |
| N    | 7  | 0.0093   |
| N    | 8  | -0.06831 |
| N    | 9  | 0.0093   |
| N    | 10 | 0.03417  |
| S    | 11 | -0.20098 |
| N    | 12 | 0.03417  |
| C    | 13 | 0.01305  |
| C    | 14 | 0.01305  |
| C    | 15 | 0.02636  |
| C    | 16 | -0.00344 |
| C    | 17 | 0.03074  |
| S    | 18 | 0.00136  |
| S    | 19 | 0.00136  |
| C    | 20 | 0.03074  |
| C    | 21 | -0.00344 |
| C    | 22 | 0.02636  |
| C    | 23 | 0.00063  |
| H    | 24 | -0.00031 |
| H    | 25 | 0.00368  |
| H    | 26 | 0.00059  |
| H    | 27 | 0.00059  |
| H    | 28 | 0.00368  |
| H    | 29 | -0.00031 |
| H    | 30 | -0.00637 |
| H    | 31 | -0.01383 |
| H    | 32 | -0.00637 |

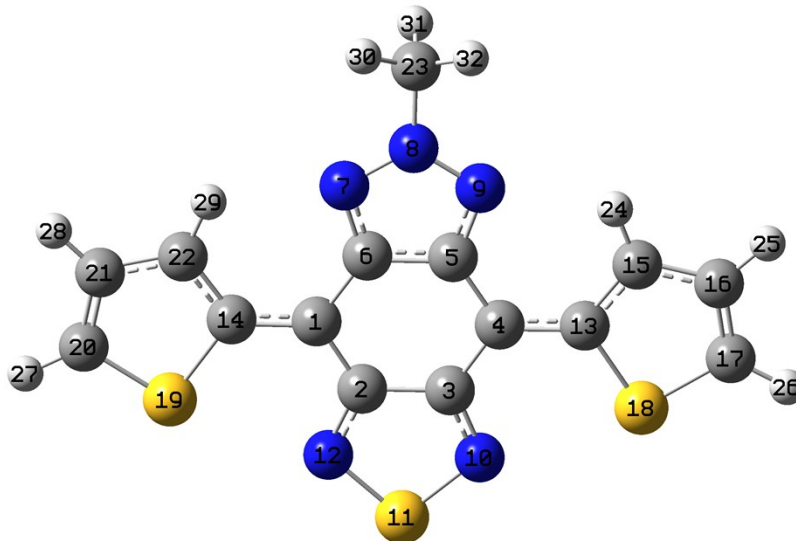

### Th<sub>2</sub>-BBT

| Atom | No | PEC      |
|------|----|----------|
| C    | 1  | 0.00448  |
| C    | 2  | 0.02291  |
| C    | 3  | 0.00535  |
| C    | 4  | 0.00448  |
| C    | 5  | 0.02291  |
| C    | 6  | 0.00535  |
| C    | 7  | 0.01714  |
| C    | 8  | 0.01714  |
| C    | 9  | 0.02345  |
| C    | 10 | -0.0003  |
| C    | 11 | 0.02262  |
| C    | 12 | 0.02345  |
| C    | 13 | -0.0003  |
| C    | 14 | 0.02262  |
| S    | 15 | 0.00846  |
| S    | 16 | 0.00846  |
| S    | 17 | -0.16721 |
| S    | 18 | -0.16721 |
| N    | 19 | 0.02626  |
| N    | 20 | 0.02531  |
| N    | 21 | 0.02531  |
| N    | 22 | 0.02626  |
| H    | 23 | 0.00565  |
| H    | 24 | 0.00392  |
| H    | 25 | 0.00197  |
| H    | 26 | 0.00565  |
| H    | 27 | 0.00392  |
| H    | 28 | 0.00197  |

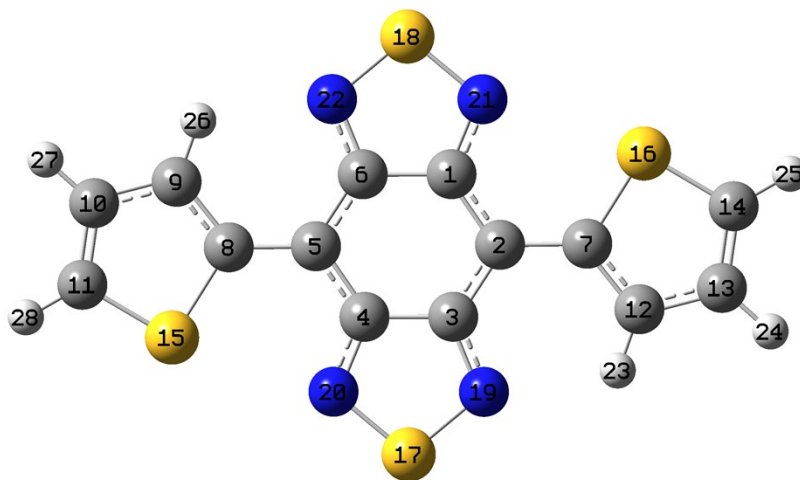

### Th<sub>2</sub>-BTa

| Atom | No | PEC      |
|------|----|----------|
| C    | 1  | 0.0012   |
| C    | 2  | 0.0069   |
| C    | 3  | 0.00033  |
| C    | 4  | 0.00033  |
| C    | 5  | 0.0069   |
| C    | 6  | 0.0012   |
| N    | 7  | -0.00446 |
| N    | 8  | -0.00446 |
| N    | 9  | -0.07139 |
| C    | 10 | 0.03015  |
| C    | 11 | 0.01082  |
| S    | 12 | -0.02719 |
| C    | 13 | 0.00464  |
| H    | 14 | 0.0037   |
| C    | 15 | 0.02191  |
| H    | 16 | 0.00272  |
| H    | 17 | -0.0003  |
| C    | 18 | 0.03015  |
| C    | 19 | 0.01082  |
| S    | 20 | -0.02719 |
| C    | 21 | 0.00464  |
| H    | 22 | 0.0037   |
| C    | 23 | 0.02191  |
| H    | 24 | 0.00272  |
| H    | 25 | -0.0003  |
| C    | 26 | 0.00028  |
| H    | 27 | -0.00695 |
| H    | 28 | -0.00695 |
| H    | 29 | -0.01588 |
| H    | 30 | 1E-05    |
| H    | 31 | 1E-05    |

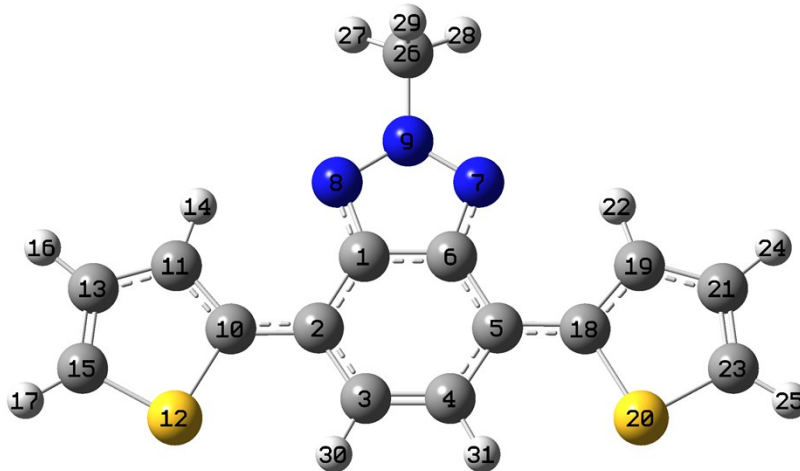

### Th<sub>2</sub>-BT

| Atom | No | PEC      |
|------|----|----------|
| S    | 1  | -0.20513 |
| C    | 2  | 0.02582  |
| C    | 3  | -0.02252 |
| C    | 4  | 0.02582  |
| C    | 5  | -0.02252 |
| C    | 6  | -0.00585 |
| H    | 7  | -0.00168 |
| C    | 8  | -0.00585 |
| H    | 9  | -0.00168 |
| N    | 10 | 0.00723  |
| N    | 11 | 0.00724  |
| C    | 12 | 0.03011  |
| C    | 13 | 0.02335  |
| S    | 14 | -0.00391 |
| C    | 15 | 0.00535  |
| H    | 16 | 0.00945  |
| C    | 17 | 0.02758  |
| H    | 18 | 0.00499  |
| H    | 19 | 0.00265  |
| C    | 20 | 0.03011  |
| C    | 21 | 0.02335  |
| S    | 22 | -0.00391 |
| C    | 23 | 0.00535  |
| H    | 24 | 0.00945  |
| C    | 25 | 0.02757  |
| H    | 26 | 0.00499  |
| H    | 27 | 0.00265  |

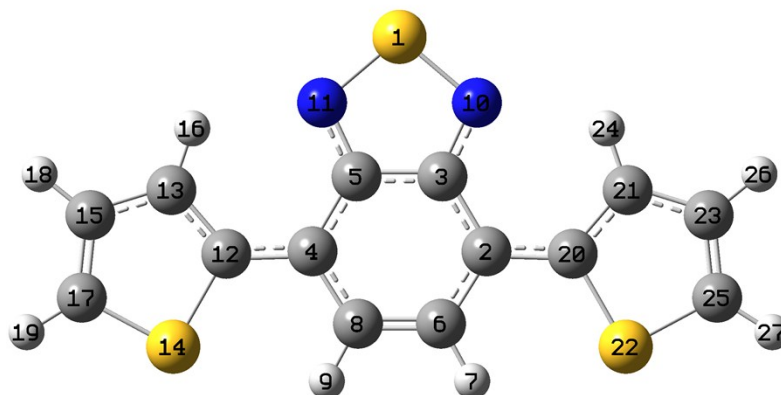

**Th<sub>2</sub>-ST**

| Atom | No | PEC      |
|------|----|----------|
| C    | 1  | 0.03538  |
| C    | 2  | -0.03347 |
| C    | 3  | 0.03538  |
| C    | 4  | -0.03347 |
| C    | 5  | -0.00521 |
| H    | 6  | -0.00158 |
| C    | 7  | -0.00521 |
| H    | 8  | -0.00158 |
| N    | 9  | -0.00088 |
| N    | 10 | -0.00088 |
| C    | 11 | 0.02614  |
| C    | 12 | 0.02712  |
| S    | 13 | -9E-05   |
| C    | 14 | 0.00505  |
| H    | 15 | 0.01017  |
| C    | 16 | 0.02799  |
| H    | 17 | 0.00542  |
| H    | 18 | 0.00324  |
| C    | 19 | 0.02614  |
| C    | 20 | 0.02712  |
| S    | 21 | -9E-05   |
| C    | 22 | 0.00505  |
| H    | 23 | 0.01017  |
| C    | 24 | 0.02799  |
| H    | 25 | 0.00542  |
| H    | 26 | 0.00324  |
| Se   | 27 | -0.19855 |

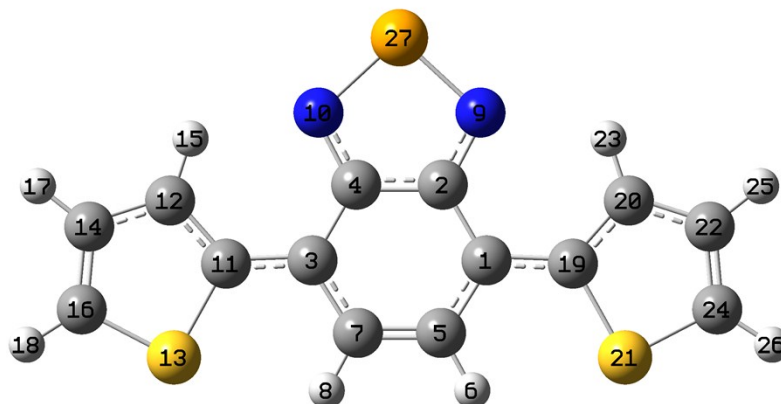

**Sh<sub>2</sub>-BT**

| Atom | No | PEC      |
|------|----|----------|
| C    | 1  | 0.02513  |
| C    | 2  | -0.02126 |
| C    | 3  | 0.02513  |
| C    | 4  | -0.02126 |
| C    | 5  | -0.00981 |
| H    | 6  | -0.00204 |
| C    | 7  | -0.00981 |
| H    | 8  | -0.00204 |
| N    | 9  | 0.00377  |
| N    | 10 | 0.00377  |
| C    | 11 | 0.03379  |
| C    | 12 | 0.02506  |
| C    | 13 | -0.00063 |
| H    | 14 | 0.00398  |
| C    | 15 | 0.03133  |
| H    | 16 | 0.00395  |
| H    | 17 | 0.00024  |
| C    | 18 | 0.03379  |
| C    | 19 | 0.02506  |
| C    | 20 | -0.00063 |
| H    | 21 | 0.00398  |
| C    | 22 | 0.03133  |
| H    | 23 | 0.00395  |
| H    | 24 | 0.00024  |
| S    | 25 | -0.21402 |
| Se   | 26 | 0.01353  |
| Se   | 27 | 0.01353  |

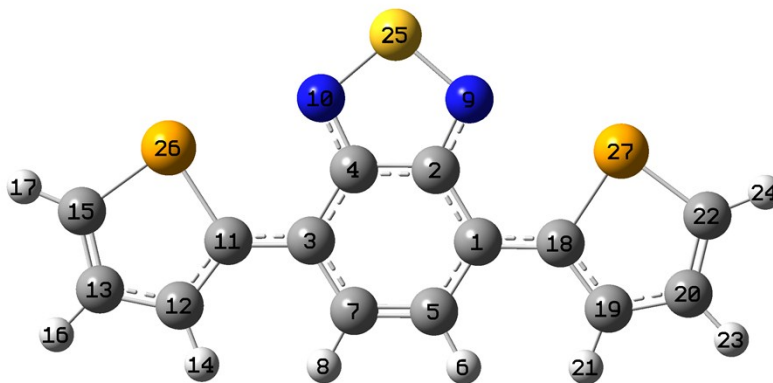

**Sh<sub>2</sub>-ST**

| Atom | No | PEC      |
|------|----|----------|
| C    | 1  | 0.03596  |
| C    | 2  | -0.03322 |
| C    | 3  | 0.03596  |
| C    | 4  | -0.03322 |
| C    | 5  | -0.0096  |
| H    | 6  | -0.00209 |
| C    | 7  | -0.0096  |
| H    | 8  | -0.00209 |
| N    | 9  | -0.00512 |
| N    | 10 | -0.00512 |
| C    | 11 | 0.03003  |
| C    | 12 | 0.03067  |
| C    | 13 | -0.0023  |
| H    | 14 | 0.00441  |
| C    | 15 | 0.0353   |
| H    | 16 | 0.00439  |
| H    | 17 | 0.00056  |
| C    | 18 | 0.03003  |
| C    | 19 | 0.03067  |
| C    | 20 | -0.0023  |
| H    | 21 | 0.00441  |
| C    | 22 | 0.0353   |
| H    | 23 | 0.00439  |
| H    | 24 | 0.00056  |
| Se   | 25 | 0.01944  |
| Se   | 26 | 0.01944  |
| Se   | 27 | -0.21689 |

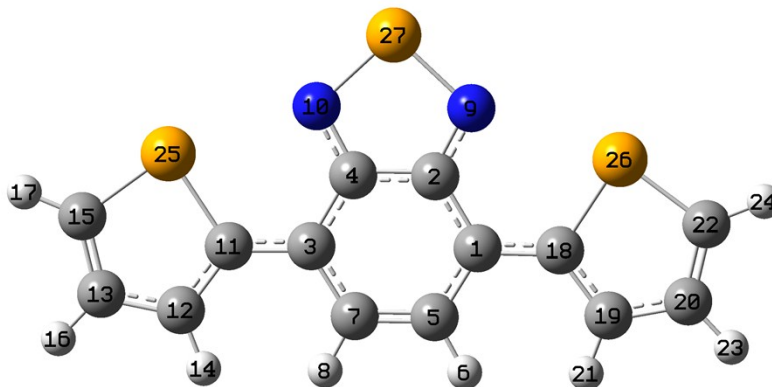



## References

- (1) Liao, H.-C.; Tam, T. L. D.; Guo, P.; Wu, Y.; Manley, E. F.; Huang, W.; Zhou, N.; Soe, C. M. M.; Wang, B.; Wasielewski, M. R.; Chen, L. X.; Kanatzidis, M. G.; Facchetti, A.; Chang, R. P. H.; Marks, T. J. Dopant-Free Hole Transporting Polymers for High Efficiency, Environmentally Stable Perovskite Solar Cells *Adv. Energy Mater.* **2016**, *6*, 1600502.
- (2) Tam, T. L.; Li, H.; Lam, Y. M.; Mhaisalkar, S. G.; Grimsdale, A. C. Synthesis and Characterization of [1,2,5]Chalcogenazolo[3,4-f]-benzo[1,2,3]triazole and [1,2,3]Triazolo[3,4-g]quinoxaline Derivatives *Org. Lett.* **2011**, *13*, 4612.
- (3) Tam, T. L.; Li, H.; Wei, F.; Tan, K. J.; Kloc, C.; Lam, Y. M.; Mhaisalkar, S. G.; Grimsdale, A. C. One-Pot Synthesis of 4,8-Dibromobenzo-[1,2-c;4,5-c']bis[1,2,5]thiadiazole *Org. Lett.* **2010**, *12*, 3340.
- (4) Berlman, I. B. *Handbook of Fluorescence Spectra of Aromatic Molecules*; Academic Press: N. Y., 1965.
- (5) Nakazono, S.; Easwaramoorthi, S.; Kim, D.; Shinokubo, H.; Osuka, A. *Org. Lett.* **2009**, *11*, 5426.
- (6) Dolomanov, O. V.; Bourhis, L. J.; Gildea, R. J.; Howard, J. A. K.; Puschmann, H. *J. Appl. Cryst.* **2009**, *42*, 339.
- (7) Sheldrick, G. M. *Acta Cryst.* **2008**, *A64*, 112.
